# Supplementary material for: Population Pharmacokinetic and Pharmacogenetic Analysis of Mitotane in Patients with Adrenocortical Carcinoma: Towards Individualized Dosing
Source: Springer Nature journal article supplement (doi:10.1007/s40262-020-00913-y), 2020-06-30
Supplement: MOESM3 [file 18133170]

## Sheet: Supplementary Material 3
Population pharmacokinetic and pharmacogenetic analysis of mitotane in patients with adrenocortical carcinoma: towards individualized dosing
Anyue Yin, Madeleine H.T. Ettaieb, Jesse J. Swen, Liselotte van Deun, Thomas M.A. Kerkhofs, Robert J.H.M. van der Straaten, Eleonora P.M. Corssmit, Hans Gelderblom, Michiel N. Kerstens, Richard A. Feelders, Marelise Eekhoff, Henri J.L.M. Timmers, Antonio D’Avolio, Jessica Cusato, Henk-Jan Guchelaar, Harm R. Haak, Dirk Jan A.R. Moes
Journal name: Clinical Pharmacokinetics
Corresponding author: Dr. Dirk Jan A.R. Moes
Affiliation: 1. Department of Clinical Pharmacy and Toxicology, Leiden University Medical Center, Leiden, the Netherlands; 2. Leiden Network for Personalized Therapeutics, Leiden University Medical Center, Leiden, the Netherlands
Email address: D.J.A.R.Moes@lumc.nl.
Online Resource 3 List of 959 SNPs from DMETTM array of which the genotyping results were obtained for each patient
Gene	Summary Flag	Common Name	Probe Set ID	dbSNP RS ID	Chrom
ABCB1	N	ABCB1_c.-129T>C	AM_14633	rs3213619	Ch7:87230193
ABCB1	N	ABCB1_c.-1G>A	AM_14631	rs2214102	Ch7:87229501
ABCB1	F17L	ABCB1_c.49T>C(F17L)	AM_14630	rs28381804	Ch7:87229452
ABCB1	N21D	ABCB1_c.61A>G(N21D)	AM_14628	rs9282564	Ch7:87229440
ABCB1	N44S	ABCB1_c.131A>G(N44S)	AM_14627	rs1202183	Ch7:87214983
ABCB1	A80E	ABCB1_c.239C>A(A80E)	AM_14625	rs9282565	Ch7:87214875
ABCB1	N	ABCB1_c.287-25G>T	AM_14624	rs2235015	Ch7:87199564
ABCB1	G185V	ABCB1_c.554G>T(G185V)	AM_14622	rs1128501	Ch7:87195534
ABCB1	N	ABCB1_c.555A>T(G185G)	AM_14621	rs1128502	Ch7:87195533
ABCB1	N	ABCB1_c.729A>G(E243E)	AM_14620	rs2235022	Ch7:87190677
ABCB1	N	ABCB1_c.738G>A(A246A)	AM_14619	rs28381867	Ch7:87190668
ABCB1	N	ABCB1_c.IVS9-44A>G	AM_14617	rs10276036	Ch7:87180198
ABCB1	S400N	ABCB1_c.1199G>A(S400N)	AM_14616	rs2229109	Ch7:87179809
ABCB1	N	ABCB1_c.1236C>T(G412G)	AM_14612	rs1128503	Ch7:87179601
ABCB1	N	ABCB1_c.1350+44C>T	AM_14610	rs2032588	Ch7:87179443
ABCB1	N	ABCB1_c.1554+24C>T	AM_14609	rs2235033	Ch7:87179143
ABCB1	N	ABCB1_c.1662G>C(L554L)	AM_14607	rs2235012	Ch7:87178727
ABCB1	E566K	ABCB1_c.1696G>A(E566K)	AM_14606	rs28381902	Ch7:87178693
ABCB1	N	ABCB1_c.1725+38A>G	AM_14605	rs2235013	Ch7:87178626
ABCB1	R593C	ABCB1_c.1777C>T(R593C)	AM_14604	rs28381914	Ch7:87175289
ABCB1	N	ABCB1_c.1794C>T(I598I)	AM_14603	rs28381915	Ch7:87175272
ABCB1	A599T	ABCB1_c.1795G>A(A599T)	AM_14602	rs2235036	Ch7:87175271
ABCB1	V801M	ABCB1_c.2401G>A(V801M)	AM_14599	rs2235039	Ch7:87165854
ABCB1	N	ABCB1_c.2481+24G>A	AM_14598	rs2235040	Ch7:87165750
ABCB1	I829V	ABCB1_c.2485A>G(I829V)	AM_14596	rs2032581	Ch7:87160810
ABCB1	N	ABCB1_c.2505A>G(V835V)	AM_14595	rs28381966	Ch7:87160790
ABCB1	I836V	ABCB1_c.2506A>G(I836V)	AM_14594	rs28381967	Ch7:87160789
ABCB1	N	ABCB1_c.2650C>T(L884L)	AM_14593	rs9282563	Ch7:87160645
ABCB1	A893S,A893T	ABCB1_c.2677G>T>A(A893SorT)	AM_14592	rs2032582	Ch7:87160618,Ch7:87160618
ABCB1	A999T	ABCB1_c.2995G>A(A999T)	AM_14591	rs72552784	Ch7:87145914
ABCB1	N	ABCB1_c.3084G>A(P1028P)	AM_14590	rs2235044	Ch7:87145825
ABCB1	P1051A	ABCB1_c.3151C>G(P1051A)	AM_14589	rs28401798	Ch7:87144678
ABCB1	G1063A	ABCB1_c.3188G>C(G1063A)	AM_14588	rs2707944	Ch7:87144641
ABCB1	N	ABCB1_c.3189C>G(G1063G)	AM_14587	rs2707943	Ch7:87144640
ABCB1	S1141T	ABCB1_c.3421T>A(S1141T)	AM_14582	rs2229107	Ch7:87138659
ABCB1	N	ABCB1_c.3435C>T(I1145I)	AM_14581	rs1045642	Ch7:87138645
ABCB1	N	ABCB1_c.3747C>G(G1249G)	AM_14579	rs2235051	Ch7:87133655
ABCB1	V1251I	ABCB1_c.3751G>A(V1251I)	AM_14578	rs28364274	Ch7:87133651
ABCB1	N	ABCB1_c.*89A>T(3'UTR)	AM_14577	rs17064	Ch7:87133470
ABCB1	N	ABCB1_c.*193A>G(3'UTR)	AM_14575	rs3842	Ch7:87133366
ABCB4	N	ABCB4_c.-1921T>C	AM_14572	rs3747806	Ch7:87106702
ABCB4	N	ABCB4_c.-1584C>T	AM_14570	rs4148805	Ch7:87106365
ABCB4	N	ABCB4_c.-1484T>C	AM_14569	rs4148806	Ch7:87106265
ABCB4	N	ABCB4_c.-1031C>T	AM_14568	rs4148807	Ch7:87105812
ABCB4	N	ABCB4_c.-1014A>G	AM_14567	rs4148808	Ch7:87105795
ABCB4	N	ABCB4_c.147C>T(S49S)	AM_14563	rs8187789	Ch7:87092213
ABCB4	N	ABCB4_c.175C>T(L59L)	AM_14562	rs2302387	Ch7:87092185
ABCB4	L73V	ABCB4_c.217C>G(L73V)	AM_14561	rs8187788	Ch7:87092143
ABCB4	N	ABCB4_c.240G>A(E80E)	AM_14560	rs8187787	Ch7:87092120
ABCB4	R144X	ABCB4_c.430C>T(R144X)	AM_14558	rs72552780	Ch7:87082366
ABCB4	N	ABCB4_c.504C>T(N168N)	AM_14556	rs1202283	Ch7:87082292
ABCB4	N	ABCB4_c.696C>T(A232A)	AM_14554	rs8187791	Ch7:87080951
ABCB4	N	ABCB4_c.711A>T(I237I)	AM_14553	rs2109505	Ch7:87079406
ABCB4	L238V	ABCB4_c.712C>G(L238V)	AM_14552	rs45596335	Ch7:87079405
ABCB4	E528D	ABCB4_c.1584G>C(E528D)	AM_14546	rs8187797	Ch7:87069130
ABCB4	Q636X	ABCB4_c.1906C>T(Q636X)	AM_14542	rs72552775	Ch7:87056224
ABCB4	R652G	ABCB4_c.1954A>G(R652G)	AM_14540	rs2230028	Ch7:87056176
ABCB4	W658X	ABCB4_c.1973G>A(W658X)	AM_14539	rs72552774	Ch7:87056157
ABCB4	N	ABCB4_c.2325G>C(T775T)	AM_14537	rs8187802	Ch7:87049383
ABCB4	R788Q	ABCB4_c.2363G>A(R788Q)	AM_14536	rs8187801	Ch7:87049345
ABCB4	N	ABCB4_c.2559T>G(G853G)	AM_14535	rs3761810	Ch7:87046751
ABCB4	N	ABCB4_c.2952A>G(A984A)	AM_14533	rs45574932	Ch7:87038681
ABCB4	N	ABCB4_c.3111T>C(N1037N)	AM_14532	rs8187808	Ch7:87037521
ABCB4	N	ABCB4_c.3144C>T(N1048N)	AM_14531	rs8187807	Ch7:87037488
ABCB4	A1100T	ABCB4_c.3298G>A(A1100T)	AM_14530	rs31655	Ch7:87035792
ABCB4	I1185V	ABCB4_c.3553A>G(I1185V)	AM_14529	rs8187811	Ch7:87032531
ABCB4	N	ABCB4_c.*509T>C	AM_14528	rs2097937	Ch7:87030903
ABCB7	N	ABCB7_c.457-2518A>G	AM_15425	rs5937939	ChX:74299007
ABCB7	N	ABCB7_c.457-1932A>T	AM_15424	rs4892538	ChX:74298421
ABCB7	R259K	ABCB7_c.776G>A(R259K)	AM_15423	rs1054913	ChX:74295279
ABCB7	L272P	ABCB7_c.815T>C(L272P)	AM_15422	rs1054914	ChX:74295240
ABCB7	A581V	ABCB7_c.1742C>T(A581V)	AM_15415	rs1340989	ChX:74284997
ABCB7	N	ABCB7_c.1743A>G(A581A)	AM_15414	rs1340990	ChX:74284996
ABCB11	N	ABCB11_c.-12519C>T	AM_12785	rs4148768	Ch2:169887154
ABCB11	N	ABCB11_c.-10013G>A	AM_12783	rs4668115	Ch2:169884648
ABCB11	N	ABCB11_c.-8583G>A	AM_12782	rs3770603	Ch2:169883218
ABCB11	N	ABCB11_c.-7449T>C	AM_12781	rs4148770	Ch2:169882084
ABCB11	N	ABCB11_c.-7056C>T	AM_12780	rs3770602	Ch2:169881691
ABCB11	N	ABCB11_c.-5543C>T	AM_12778	rs7602171	Ch2:169880178
ABCB11	N	ABCB11_c.-2450A>G	AM_12776	rs7578587	Ch2:169877085
ABCB11	N	ABCB11_c.-904C>A	AM_12775	rs3755163	Ch2:169875539
ABCB11	N	ABCB11_c.-899delCT	AM_12772	rs4148771	Ch2:169875534
ABCB11	N	ABCB11_c.-899delCT_alternate	AM_12773	rs4148771	Ch2:169875534,Ch2:169875534
ABCB11	N	ABCB11_c.-610C>A	AM_12771	rs3755162	Ch2:169875245
ABCB11	N	ABCB11_c.99-18T>C	AM_12767	rs4148776	Ch2:169870882
ABCB11	N	ABCB11_c.108T>C(D36D)	AM_12766	rs3815675	Ch2:169870855
ABCB11	N	ABCB11_c.270T>C(F90F)	AM_12762	rs4148777	Ch2:169869901
ABCB11	G238V	ABCB11_c.713G>T(G238V)	AM_12749	rs72551306	Ch2:169850291
ABCB11	N	ABCB11_c.807T>C(Y269Y)	AM_12744	rs2287616	Ch2:169847412
ABCB11	R299K	ABCB11_c.896G>A(R299K)	AM_12742	rs2287617	Ch2:169847323
ABCB11	N	ABCB11_c.957A>G(G319G)	AM_12739	rs7563233	Ch2:169842746
ABCB11	A444V	ABCB11_c.1331C>T(A444V)	AM_12726	rs2287622	Ch2:169830328
ABCB11	D482G	ABCB11_c.1445A>G(D482G)	AM_12722	rs72549402	Ch2:169828550
ABCB11	R575X	ABCB11_c.1723C>T(R575X)	AM_12719	rs72549401	Ch2:169826641
ABCB11	N	ABCB11_c.2412A>G(A804A)	AM_12688	rs11568373	Ch2:169801403
ABCB11	G982R	ABCB11_c.2944G>A(G982R)	AM_12677	rs72549399	Ch2:169791806
ABCB11	N	ABCB11_c.3084A>G(A1028A)	AM_12674	rs497692	Ch2:169789016
ABCB11	R1057X	ABCB11_c.3169C>T(R1057X)	AM_12672	rs72549397	Ch2:169788931
ABCB11	R1090X	ABCB11_c.3268C>T(R1090X)	AM_12670	rs72549396	Ch2:169787318
ABCB11	R1153C	ABCB11_c.3457C>T(R1153C)	AM_12667	rs72549395	Ch2:169783827
ABCB11	E1186K	ABCB11_c.3556G>A(E1186K)	AM_12666	rs1521808	Ch2:169783728
ABCB11	R1268Q	ABCB11_c.3803G>A(R1268Q)	AM_12660	rs72549394	Ch2:169780295
ABCB11	N	ABCB11_c.*236G>A	AM_12658	rs473351	Ch2:169779896
ABCB11	N	ABCB11_c.*281T>G	AM_12657	rs3732038	Ch2:169779851
ABCB11	N	ABCB11_c.*368G>A	AM_12656	rs495714	Ch2:169779764
ABCB11	N	ABCB11_c.*420A>G	AM_12655	rs496550	Ch2:169779712
ABCC1	S92F	ABCC1_c.275C>T(S92F)	AM_10915	rs8187844	Ch16:16103682
ABCC1	R230Q	ABCC1_c.689G>A(R230Q)	AM_10917	rs8187848	Ch16:16130340
ABCC1	N	ABCC1_c.825T>C(V275V)	AM_10920	rs246221	Ch16:16138322
ABCC1	V353M	ABCC1_c.1057G>A(V353M)	AM_10922	rs8187852	Ch16:16139709
ABCC1	N	ABCC1_c.1068G>A(T356T)	AM_10924	rs8187853	Ch16:16139720
ABCC1	R433S	ABCC1_c.1299G>T(R433S)	AM_10925	rs60782127	Ch16:16142079
ABCC1	D526A,526FS	ABCC1_c.1577A>CorCA(D526AorX)	AM_10926	rs72547522	Ch16:16150052,Ch16:16150052
ABCC1	N	ABCC1_c.1704C>T(Y568Y)	AM_10928	rs8187858	Ch16:16162039
ABCC1	N	ABCC1_c.1911C>T(D637D)	AM_10929	rs8187859	Ch16:16165585
ABCC1	N	ABCC1_c.2001C>T(S667S)	AM_10930	rs8187863	Ch16:16173221
ABCC1	N	ABCC1_c.2007C>T(P669P)	AM_10931	rs2301666	Ch16:16173227
ABCC1	R723Q	ABCC1_c.2168G>A(R723Q)	AM_10932	rs4148356	Ch16:16177275
ABCC1	N	ABCC1_c.3282G>A(P1094P)	AM_10936	rs4148377	Ch16:16215891
ABCC1	T1345M	ABCC1_c.4034C>T(T1345M)	AM_10939	rs8057331	Ch16:16230411
ABCC1	N	ABCC1_c.*866T>A	AM_10944	rs212090	Ch16:16236004
ABCC1	N	ABCC1_c.*1293G>A	AM_10945	rs4148380	Ch16:16236431
ABCC1	N	ABCC1_c.*1385G>T	AM_10946	rs8056298	Ch16:16236523
ABCC1	N	ABCC1_c.*1512T>C	AM_10947	rs212091	Ch16:16236650
ABCC2	N	ABCC2_c.-24C>T(5'UTR)	AM_10143	rs717620	Ch10:101542578
ABCC2	N	ABCC2_c.-23G>A(5'UTR)	AM_10144	rs17216156	Ch10:101542579
ABCC2	F39Y	ABCC2_c.116T>A(F39Y)	AM_10145	rs927344	Ch10:101544447
ABCC2	N	ABCC2_c.159A>G(K53K)	AM_10146	rs17222596	Ch10:101544490
ABCC2	M246L	ABCC2_c.736A>C(M246L)	AM_10147	rs17222744	Ch10:101556957
ABCC2	D333G	ABCC2_c.998A>G(D333G)	AM_10149	rs17222674	Ch10:101559094
ABCC2	R353H	ABCC2_c.1058G>A(R353H)	AM_10150	rs7080681	Ch10:101560169
ABCC2	N	ABCC2_c.1219C>T(L407L)	AM_10151	rs17216198	Ch10:101563785
ABCC2	V417I	ABCC2_c.1249G>A(V417I)	AM_10152	rs2273697	Ch10:101563815
ABCC2	N	ABCC2_c.1434G>T>A(A478AorA)	AM_10153	rs4267009	Ch10:101564000,Ch10:101564000
ABCC2	T486I	ABCC2_c.1457C>T(T486I)	AM_10154	rs17222589	Ch10:101564023
ABCC2	K495E	ABCC2_c.1483A>G(K495E)	AM_10155	rs17222561	Ch10:101565157
ABCC2	F562L	ABCC2_c.1686T>G(F562L)	AM_10156	rs17216233	Ch10:101567857
ABCC2	602FS	ABCC2_c.1803insC	AM_10157	rs72558198	Ch10:101567974
ABCC2	I670T	ABCC2_c.2009T>C(I670T)	AM_10158	rs17222632	Ch10:101572816
ABCC2	N	ABCC2_c.2073C>A(V691V)	AM_10159	rs17222624	Ch10:101572880
ABCC2	N718S	ABCC2_c.2153A>G(N718S)	AM_10160	rs3740072	Ch10:101577123
ABCC2	R768W	ABCC2_c.2302C>T(R768W)	AM_10161	rs56199535	Ch10:101578577
ABCC2	S789F	ABCC2_c.2366C>T(S789F)	AM_10162	rs56220353	Ch10:101578641
ABCC2	L849R	ABCC2_c.2546T>G(L849R)	AM_10163	rs17222617	Ch10:101578952
ABCC2	E893Q	ABCC2_c.2677G>C(E893Q)	AM_10164	rs3740071	Ch10:101590120
ABCC2	Y967X	ABCC2_c.2901C>A(Y967X)	AM_10166	rs17222547	Ch10:101591385
ABCC2	N	ABCC2_c.2934G>A(S978S)	AM_10167	rs3740070	Ch10:101591418
ABCC2	I982V	ABCC2_c.2944A>G(I982V)	AM_10168	rs17222554	Ch10:101591428
ABCC2	I1036T	ABCC2_c.3107T>C(I1036T)	AM_10169	rs45441199	Ch10:101591737
ABCC2	R1066X	ABCC2_c.3196C>T(R1066X)	AM_10171	rs72558199	Ch10:101591826
ABCC2	N	ABCC2_c.3396T>C(I1132I)	AM_10172	rs17216345	Ch10:101594274
ABCC2	I1173F	ABCC2_c.3517A>T(I1173F)	AM_10174	rs72558201	Ch10:101595950
ABCC2	R1181L	ABCC2_c.3542G>T(R1181L)	AM_10175	rs8187692	Ch10:101595975
ABCC2	N	ABCC2_c.3561G>A(E1187E)	AM_10176	rs17216324	Ch10:101595994
ABCC2	V1188E	ABCC2_c.3563T>A(V1188E)	AM_10177	rs17222723	Ch10:101595996
ABCC2	T1273A	ABCC2_c.3817A>G(T1273A)	AM_10178	rs8187699	Ch10:101603631
ABCC2	P1291L	ABCC2_c.3872C>T(P1291L)	AM_10179	rs17216317	Ch10:101604107
ABCC2	K1299Q	ABCC2_c.3895A>C(K1299Q)	AM_10180	rs4148400	Ch10:101604130
ABCC2	N	ABCC2_c.3927C>T(Y1309Y)	AM_10181	rs4148401	Ch10:101604162
ABCC2	R1310X	ABCC2_c.3928C>T(R1310X)	AM_10182	rs66898362	Ch10:101604163
ABCC2	N	ABCC2_c.3972C>T(I1324I)	AM_10183	rs3740066	Ch10:101604207
ABCC2	N	ABCC2_c.4062C>T(A1354A)	AM_10184	rs17216275	Ch10:101605455
ABCC2	N	ABCC2_c.4110C>T(L1370L)	AM_10185	rs7899457	Ch10:101605503
ABCC2	N	ABCC2_c.4290G>T(V1430V)	AM_10188	rs1137968	Ch10:101606861
ABCC2	A1450S,A1450T	ABCC2_c.4348G>T>A(A1450SorT)	AM_10189	rs56296335	Ch10:101610393,Ch10:101610393
ABCC2	N	ABCC2_c.4410G>A(E1470E)	AM_10190	rs8187706	Ch10:101610455
ABCC2	N	ABCC2_c.4488C>T(H1496H)	AM_10191	rs8187707	Ch10:101610533
ABCC2	N	ABCC2_c.4527C>T(N1509N)	AM_10192	rs8187709	Ch10:101611277
ABCC2	C1515Y	ABCC2_c.4544G>A(C1515Y)	AM_10193	rs8187710	Ch10:101611294
ABCC3	A528G	ABCC3_c.1583C>G(A528G)	AM_11225	rs1003355	Ch17:48745066
ABCC3	N	ABCC3_c.3039C>T(G1013G)	AM_11231	rs4148416	Ch17:48753423
ABCC3	R1297H	ABCC3_c.3890G>A(R1297H)	AM_11235	rs11568591	Ch17:48761053
ABCC3	N	ABCC3_c.3942C>T(H1314H)	AM_11236	rs2277624	Ch17:48761105
ABCC3	L1362V	ABCC3_c.4084C>G(L1362V)	AM_11239	rs1051625	Ch17:48761439
ABCC3	N	ABCC3_c.4509A>G(E1503E)	AM_11243	rs1051640	Ch17:48768486
ABCC4	C171G	ABCC4_c.511T>G(C171G)	AM_10640	rs4148460	Ch13:95886884
ABCC4	K304N	ABCC4_c.912G>T(K304N)	AM_10634	rs2274407	Ch13:95859035
ABCC4	N	ABCC4_c.951A>G(R317R)	AM_10633	rs2274406	Ch13:95858996
ABCC4	N	ABCC4_c.969G>A(S323S)	AM_10632	rs2274405	Ch13:95858978
ABCC4	631FS	ABCC4_c.1892delT(L631X)	AM_10624	rs72559753	Ch13:95818554
ABCC4	E757K	ABCC4_c.2269G>A(E757K)	AM_10622	rs3765534	Ch13:95815415
ABCC4	N	ABCC4_c.2712G>A(L904L)	AM_10618	rs1678339	Ch13:95727780
ABCC4	N	ABCC4_c.2844C>T(F948F)	AM_10617	rs1189466	Ch13:95726541
ABCC4	N,1116FS	ABCC4_c.3348A>GorDel(K1116KorX)	AM_10611	rs1751034	Ch13:95714976,Ch13:95714976
ABCC4	N	ABCC4_c.*38T>G	AM_10604	rs3742106	Ch13:95673791
ABCC4	N	ABCC4_c.*311G>A	AM_10603	rs4148551	Ch13:95673518
ABCC4	N	ABCC4_c.*694G>A	AM_10602	rs4148553	Ch13:95673135
ABCC4	N	ABCC4_c.*879T>C	AM_10601	rs1059751	Ch13:95672950
ABCC4	N	ABCC4_c.*1282T>C	AM_10600	rs4148554	Ch13:95672547
ABCC4	N	ABCC4_c.*1351T>C	AM_10599	rs1059754	Ch13:95672478
ABCC4	N	ABCC4_c.*1564A>T	AM_10598	rs4148555	Ch13:95672265
ABCC5	N	ABCC5_c.1146A>G(Q382Q)	AM_13400	rs7636910	Ch3:183699516
ABCC5	N	ABCC5_c.1200C>T(S400S)	AM_13397	rs1053386	Ch3:183696387
ABCC5	N	ABCC5_c.1782C>T(C594C)	AM_13393	rs939336	Ch3:183685534
ABCC5	1147FS	ABCC5_c.3441_3442insC(V1147X)	AM_13381	rs72551384	Ch3:183663700
ABCC5	Y1202X	ABCC5_c.3606C>A(Y1202X)	AM_13378	rs1053351	Ch3:183660603
ABCC5	N	ABCC5_c.3624C>T(L1208L)	AM_13377	rs3749442	Ch3:183660585
ABCC5	T1383N	ABCC5_c.4148C>A(T1383N)	AM_13370	rs1053387	Ch3:183643407
ABCC5	N	ABCC5_c.*1243G>A	AM_13365	rs562	Ch3:183637845
ABCC5	N	ABCC5_c.*1366A>C	AM_13364	rs3805114	Ch3:183637722
ABCC6	N	ABCC6_c.1890C>G(T630T)	AM_10978	rs8058696	Ch16:16278869
ABCC6	H632Q	ABCC6_c.1896C>A(H632Q)	AM_10977	rs8058694	Ch16:16278863
ABCC6	V665A	ABCC6_c.1994T>C(V665A)	AM_10976	rs4341770	Ch16:16276737
ABCC6	N	ABCC6_c.2400G>A(G800G)	AM_10968	rs7500834	Ch16:16272670
ABCC6	V848M	ABCC6_c.2542G>A(V848M)	AM_10966	rs6416668	Ch16:16271357
ABCC6	N	ABCC6_c.2835C>T(P945P)	AM_10964	rs2856585	Ch16:16263663
ABCC6	R1268Q	ABCC6_c.3803G>A(R1268Q)	AM_10959	rs2238472	Ch16:16251599
ABCC8	R248X	ABCC8_c.742C>T(R248X)	AM_10301	rs72559730	Ch11:17483210
ABCC8	631FS	ABCC8_c.1891delC(P631X)	AM_10287	rs72559725	Ch11:17450144
ABCC8	701FS	ABCC8_c.2101_2102insT(I701X)	AM_10285	rs72559724	Ch11:17449428
ABCC8	R836X	ABCC8_c.2506C>T(R836X)	AM_10281	rs72559722	Ch11:17434263
ABCC8	L1014X	ABCC8_c.3041T>A(L1014X)	AM_10277	rs67706538	Ch11:17428556
ABCC8	S1369A	ABCC8_c.4105T>G(S1369A)	AM_10270	rs757110	Ch11:17418477
ABCC8	V1572I	ABCC8_c.4714G>A(V1572I)	AM_10260	rs8192690	Ch11:17414570
ABCC9	N	ABCC9_c.669G>T(L223L)	AM_10558	rs17846788	Ch12:22068749
ABCC9	N	ABCC9_c.789C>T(C263C)	AM_10557	rs58386780	Ch12:22068629
ABCC9	N	ABCC9_c.1035G>A(K345K)	AM_10556	rs72559752	Ch12:22063889
ABCC9	N	ABCC9_c.1296C>T(P432P)	AM_10555	rs10770865	Ch12:22063115
ABCC9	N	ABCC9_c.1848C>T(D616D)	AM_10554	rs61001398	Ch12:22040823
ABCC9	A1513T	ABCC9_c.4537G>A(A1513T)	AM_10546	rs72559751	Ch12:21958221
ABCG1	N	ABCG1_c.589-407A>G	AM_12204	rs492338	Ch21:43701977
ABCG1	N	ABCG1_c.973+672G>A	AM_12205	rs3788007	Ch21:43706776
ABCG1	N	ABCG1_c.974-898C>G	AM_12206	rs425215	Ch21:43707101
ABCG1	N	ABCG1_c.1430-293C>G	AM_12207	rs914189	Ch21:43710909
ABCG1	N	ABCG1_c.1809-252G>A	AM_12208	rs3788010	Ch21:43716022
ABCG1	N	ABCG1_c.*399G>A	AM_12209	rs1044317	Ch21:43716901
ABCG1	N	ABCG1_c.*1981G>A	AM_12210	rs1541290	Ch21:43718483
ABCG2	N	ABCG2_c.369C>T(Y123Y)	AM_13690	rs2231139	Ch4:89052964
ABCG2	Q126X	ABCG2_c.376C>T(Q126X)	AM_13689	rs72552713	Ch4:89052957
ABCG2	Q141K	ABCG2_c.421C>A(Q141K)	AM_13688	rs2231142	Ch4:89052323
ABCG2	Q166E	ABCG2_c.496C>G(Q166E)	AM_13687	rs1061017	Ch4:89052248
ABCG2	N	ABCG2_c.564A>G(G188G)	AM_13686	rs3116439	Ch4:89042912
ABCG2	F208S	ABCG2_c.623T>C(F208S)	AM_13683	rs1061018	Ch4:89042853
ABCG2	S248P	ABCG2_c.742T>C(S248P)	AM_13682	rs3116448	Ch4:89039360
ABCG2	E334X	ABCG2_c.1000G>T(E334X)	AM_13681	rs3201997	Ch4:89034649
ATP7A	L142V	ATP7A_c.424C>G(L142V)	AM_15437	rs61743418	ChX:77244041
ATP7A	Q167X	ATP7A_c.499C>T(Q167X)	AM_15438	rs72554635	ChX:77244116
ATP7A	I189V	ATP7A_c.565A>G(I189V)	AM_15439	rs2228447	ChX:77244182
ATP7A	R409X	ATP7A_c.1225C>T(R409X)	AM_15440	rs72554636	ChX:77245343
ATP7A	N	ATP7A_c.1390T>C(L464L)	AM_15441	rs2234934	ChX:77254028
ATP7A	V767L	ATP7A_c.2299G>C(V767L)	AM_15454	rs2227291	ChX:77268502
ATP7A	V1401L	ATP7A_c.4201G>C(V1401L)	AM_15472	rs5959130	ChX:77301044
CDA	*2	CDA*2_c.79A>C(K27Q)	AM_11499	rs2072671	Ch1:20915701
CDA	*3	CDA*3_c.208G>A(A70T)	AM_11506	rs60369023	Ch1:20931474
CDA	N	CDA_c.-88G>A	AM_11498	rs602946	Ch1:20915535
CDA	N	CDA_c.154+1015A>G	AM_11500	rs818202	Ch1:20916791
CDA	N	CDA_c.154+3136T>C	AM_11501	rs10916824	Ch1:20918912
CDA	N	CDA_c.435C>T(T145T)	AM_11520	rs1048977	Ch1:20945055
CES2	N	CES2_c.268+947A>T	AM_11065	rs11568314	Ch16:66970561
CES2	N	CES2_c.269-965A>G	AM_11066	rs4783745	Ch16:66970975
CES2	N	CES2_c.269-683G>A	AM_11067	rs11568311	Ch16:66971257
CES2	R98W	CES2_c.292C>T(R98W)	AM_11068	rs72547531	Ch16:66971963
CES2	V206M	CES2_c.616G>A(V206M)	AM_11070	rs72547532	Ch16:66974125
CES2	IVS8	CES2_c.1330-2A>G(SpliceDefect)	AM_11075	rs72547533	Ch16:66976006
CES2	IVS10	CES2_c.1613-88C>T(SpliceDefect)	AM_11076	rs3893757	Ch16:66977114
CHST7	N	CHST7_c.*31+10802G>A	AM_15403	rs6521128	ChX:46445660
CHST7	N	CHST7_c.*32-7531A>C	AM_15404	rs11796837	ChX:46449664
CHST7	N	CHST7_c.*32-2930C>A	AM_15405	rs12012841	ChX:46454265
CHST7	N	CHST7_c.*58G>A(3'UTR)	AM_15406	rs7056956	ChX:46457221
CHST7	N	CHST7_c.*623A>G(3'UTR)	AM_15407	rs735716	ChX:46457786
CHST7	N	CHST7_c.*675+785T>G(3'UTR)	AM_15408	rs732316	ChX:46458623
CHST7	N	CHST7_c.*675+2777C>T(3'UTR)	AM_15409	rs12014644	ChX:46460615
CYP1A1	*6	CYP1A1*6_1635G>T(M331I)	AM_10774	rs56313657	Ch15:75013804
CYP1A1	*7	CYP1A1*7_2345insT	AM_10771	rs72547510	Ch15:75013093
CYP1A1	*8	CYP1A1*8_2413T>A(I448N)	AM_10770	rs72547509	Ch15:75013026
CYP1A1	*4	CYP1A1*4_2452C>A(T461N)	AM_10769	rs1799814	Ch15:75012987
CYP1A1	*2C	CYP1A1*2C_2454A>G(I462V)	AM_10768	rs1048943	Ch15:75012985
CYP1A1	*5,*9	CYP1A1*5or*9_2460C>A>T(R464SorC)	AM_10766	rs41279188	Ch15:75012979,Ch15:75012979
CYP1A1	*10	CYP1A1*10_2499C>T(R477W)	AM_10765	rs56240201	Ch15:75012940
CYP1A1	*3	CYP1A1*3_3204T>C(3'UTR)	AM_10762	rs1800031	Ch15:75012235
CYP1A1	G45D	CYP1A1_134G>A(G45D)	AM_10778	rs4646422	Ch15:75015305
CYP1A1	R279W	CYP1A1_1390C>T(R279W)	AM_10776	rs34260157	Ch15:75014049
CYP1A1	I286T	CYP1A1_1412T>C(I286T)	AM_10775	rs4987133	Ch15:75014027
CYP1A1	F381L	CYP1A1_1876C>A(F381L)	AM_10772	rs2856833	Ch15:75013563
CYP1A1	A463G	CYP1A1_2458C>G(A463G)	AM_10767	rs2278970	Ch15:75012981
CYP1A2	PR	CYP1A2*1C_-3860G>A(Promoter)	AM_10780	rs2069514	Ch15:75038220
CYP1A2	*1K	CYP1A2*1K_-729C>T(Promoter)	AM_10784	rs12720461	Ch15:75041351
CYP1A2	PR	CYP1A2*1F_-163C>A(Promoter)	AM_10785	rs762551	Ch15:75041917
CYP1A2	*2	CYP1A2*2_63C>G(F21L)	AM_10787	rs56160784	Ch15:75042142
CYP1A2	*15	CYP1A2*15_125C>G(P42R)	AM_10788	rs72547511	Ch15:75042204
CYP1A2	*11	CYP1A2*11_558C>A(F186L)	AM_10793	rs72547513	Ch15:75042637
CYP1A2	*3	CYP1A2*3_2116G>A(D348N)	AM_10796	rs56276455	Ch15:75044195
CYP1A2	*16	CYP1A2*16_2473G>A(R377Q)	AM_10798	rs72547515	Ch15:75044552
CYP1A2	*4	CYP1A2*4_2499A>T(I386F)	AM_10799	rs72547516	Ch15:75044578
CYP1A2	*5	CYP1A2*5_3497G>A(C406Y)	AM_10801	rs55889066	Ch15:75045575
CYP1A2	*7	CYP1A2*7_3533G>A(SpliceDefect)	AM_10802	rs56107638	Ch15:75045612
CYP1A2	*6	CYP1A2*6_5090C>T(R431W)	AM_10803	rs28399424	Ch15:75047169
CYP1A2	*8	CYP1A2*8_5166G>A(R456H)	AM_10805	rs72547517	Ch15:75047245
CYP1A2	*1D	CYP1A2*1D_-2467delT(Promoter)	AM_10782	rs35694136	Ch15:75039613
CYP1A2	PR	CYP1A2*1K_-739T>G(Promoter)	AM_10783	rs2069526	Ch15:75041341
CYP1A2	N	CYP1A2_5347T>C(N516N)	AM_10807	rs2470890	Ch15:75047426
CYP1B1	*12	CYP1B1*12_182G>A(G61E)	AM_12493	rs28936700	Ch2:38302350
CYP1B1	*17	CYP1B1*17_4096del13(RVQAE355X)	AM_12473	rs72549380	Ch2:38298421
CYP1B1	*18	CYP1B1*18_4125G>T(G365W)	AM_12471	rs55771538	Ch2:38298404
CYP1B1	*19	CYP1B1*19_4168C>T(P379L)	AM_12467	rs56305281	Ch2:38298361
CYP1B1	*20	CYP1B1*20_4191G>A(E387K)	AM_12466	rs55989760	Ch2:38298338
CYP1B1	*21	CYP1B1*21_4201G>A(R390H)	AM_12465	rs56010818	Ch2:38298328
CYP1B1	*3	CYP1B1*3_4326C>G(L432V)	AM_12461	rs1056836	Ch2:38298203
CYP1B1	*23	CYP1B1*23_4342C>T(P437L)	AM_12460	rs56175199	Ch2:38298187
CYP1B1	*7	CYP1B1*7_4360C>G(A443G)	AM_12458	rs4986888	Ch2:38298169
CYP1B1	*24	CYP1B1*24_4377delG(D449X)	AM_12456	rs72549375	Ch2:38298152
CYP1B1	*4	CYP1B1*4_4390A>G(N453S)	AM_12454	rs1800440	Ch2:38298139
CYP1B1	*25	CYP1B1*25_4437C>T(R469W)	AM_12452	rs28936701	Ch2:38298092
CYP1B1	N	CYP1B1_81G>C(L27L)	AM_12498	rs4987135	Ch2:38302451
CYP1B1	R355X	CYP1B1_4095C>T(R355X)	AM_12474	rs72549381	Ch2:38298434
CYP1B1	M372V	CYP1B1_4146A>G(M372V)	AM_12469	rs4398252	Ch2:38298383
CYP1B1	N,D449DorE	CYP1B1_4379C>TorA(D449DorE)	AM_12455	rs1056837	Ch2:38298150,Ch2:38298150
CYP1B1	N	CYP1B1_4424A>T(S464S)	AM_12453	rs4986889	Ch2:38298105
CYP2A6	*9	CYP2A6*9_-48T>G(Promoter)	AM_11361	rs28399433	Ch19:41356379
CYP2A6	*13	CYP2A6*13_13G>A(G5R)	AM_11360	rs28399434	Ch19:41356319
CYP2A6	*6	CYP2A6*6_1703G>A(R128Q)	AM_11353	rs4986891	Ch19:41354629
CYP2A6	*2	CYP2A6*2_1799T>A(L160H)	AM_11351	rs1801272	Ch19:41354533
CYP2A6	*20	CYP2A6*20_2141delAA(K196X)	AM_11346	rs28399444	Ch19:41354190
CYP2A6	*11	CYP2A6*11_3391T>C(S224P)	AM_11344	rs111033610	Ch19:41352941
CYP2A6	*17	CYP2A6*17_5065G>A(V365M)	AM_11337	rs28399454	Ch19:41351267
CYP2A6	*7	CYP2A6*7_6558T>C(I471T)	AM_11330	rs5031016	Ch19:41349774
CYP2A6	*28	CYP2A6*28_5750G>C(E419D)	AM_11332	rs8192730	Ch19:41350582
CYP2A6	*8	CYP2A6*8_6600G>T(R485L)	AM_11327	rs28399468	Ch19:41349732
CYP2A6	*1D	CYP2A6*1D_-1013A>G	AM_11364	rs4803381	Ch19:41357344
CYP2A6	N	CYP2A6_22C>T(L8L)	AM_11359	rs8192720	Ch19:41356310
CYP2A6	N	CYP2A6_51G>A(V17V)	AM_11358	rs1137115	Ch19:41356281
CYP2A6	N	CYP2A6_1874G>T	AM_11349	rs28399442	Ch19:41354458
CYP2A6	N	CYP2A6_3420A>G(P233P)	AM_11343	rs3891219	Ch19:41352912
CYP2A6	N	CYP2A6_3570C>G	AM_11342	rs4079369	Ch19:41352762
CYP2A6	N	CYP2A6_4365A>G(K289K)	AM_11341	rs2644905	Ch19:41351967
CYP2A6	387FS	CYP2A6_5132delA(K387X)	AM_11336	rs72547582	Ch19:41351200
CYP2A6	N	CYP2A6_5336G>A	AM_11334	rs8192729	Ch19:41350996
CYP2A13	N	CYP2A13_2366C>T	AM_11440	rs1645691	Ch19:41596742
CYP2A13	N	CYP2A13_6432C>T	AM_11446	rs1645694	Ch19:41600808
CYP2A13	N	CYP2A13_7233T>G	AM_11449	rs1709082	Ch19:41601609
CYP2A13	P321L	CYP2A13_5289C>T(P321L)	AM_11443	rs3885816	Ch19:41599665
CYP2B6	*22	CYP2B6*22_-82T>C	AM_11398	rs34223104	Ch19:41497129
CYP2B6	*2	CYP2B6*2_64C>T(R22C)	AM_11399	rs8192709	Ch19:41497274
CYP2B6	*11	CYP2B6*11_136A>G(M46V)	AM_11401	rs35303484	Ch19:41497346
CYP2B6	*12	CYP2B6*12_12820G>A(G99E)	AM_11403	rs36060847	Ch19:41510030
CYP2B6	*8	CYP2B6*8_13072A>G(K139E)	AM_11405	rs12721655	Ch19:41510282
CYP2B6	*14	CYP2B6*14_13076G>A(R140Q)	AM_11406	rs35773040	Ch19:41510286
CYP2B6	*26	CYP2B6*26_15614C>G(P167A)	AM_11409	rs3826711	Ch19:41512824
CYP2B6	*20	CYP2B6*20_15618C>T(T168I)	AM_11410	rs36056539	Ch19:41512828
CYP2B6	*6	CYP2B6*6_15631G>T(Q172H)	AM_11411	rs3745274	Ch19:41512841
CYP2B6	*27	CYP2B6*27_15708T>C(M198T)	AM_11413	rs36079186	Ch19:41512918
CYP2B6	*3	CYP2B6*3_18045C>A(S259R)	AM_11414	rs45482602	Ch19:41515255
CYP2B6	*4	CYP2B6*4_18053A>G(K262R)	AM_11415	rs2279343	Ch19:41515263
CYP2B6	*16	CYP2B6*16_21011T>C(I328T)	AM_11417	rs28399499	Ch19:41518221
CYP2B6	*19	CYP2B6*19_21034C>T(R336C)	AM_11418	rs34826503	Ch19:41518244
CYP2B6	*28	CYP2B6*28_21160C>T(R378X)	AM_11419	rs34097093	Ch19:41518370
CYP2B6	*15	CYP2B6*15_21388T>A(I391N)	AM_11420	rs35979566	Ch19:41518598
CYP2B6	*21	CYP2B6*21_21498C>A(P428T)	AM_11422	rs35010098	Ch19:41518708
CYP2B6	*5	CYP2B6*5_25505C>T(R487C)	AM_11426	rs3211371	Ch19:41522715
CYP2B6	N	CYP2B6_12740G>C(P72P)	AM_11402	rs2279341	Ch19:41509950
CYP2B6	N	CYP2B6_14593C>G	AM_11407	rs4803418	Ch19:41511803
CYP2B6	N	CYP2B6_15582C>T	AM_11408	rs4803419	Ch19:41512792
CYP2B6	N	CYP2B6_18273G>A	AM_11416	rs2279344	Ch19:41515483
CYP2B6	N	CYP2B6_21563C>T	AM_11423	rs8192719	Ch19:41518773
CYP2C8	*3	CYP2C8*3_2130G>A(R139K)	AM_10135	rs11572080	Ch10:96827030
CYP2C8	*5	CYP2C8*5_2189delA(T159X)	AM_10133	rs72558196	Ch10:96826971
CYP2C8	*7,*8	CYP2C8*7or*8_4517C>T>G(R186XorG)	AM_10131	rs72558195	Ch10:96824643,Ch10:96824643
CYP2C8	*4	CYP2C8*4_11041C>G(I264M)	AM_10129	rs1058930	Ch10:96818119
CYP2C8	*2	CYP2C8*2_11054A>T(I269F)	AM_10128	rs11572103	Ch10:96818106
CYP2C8	*3	CYP2C8*3_30411A>G(K399R)	AM_10125	rs10509681	Ch10:96798749
CYP2C8	*12	CYP2C8*12_32184_32186delTTG(V461X)	AM_10123	rs3832694	Ch10:96796974
CYP2C8	N	CYP2C8_-86A>C	AM_10138	rs11572066	Ch10:96829245
CYP2C8	L390S	CYP2C8_30384T>C(L390S)	AM_10126	rs72558194	Ch10:96798776
CYP2C8	P404A	CYP2C8_30425C>G(P404A)	AM_10124	rs66501115	Ch10:96798735
CYP2C8	N	CYP2C8_32364C>T(3'UTR)	AM_10122	rs28399518	Ch10:96796796
CYP2C9	*13	CYP2C9*13_3276T>C(L90P)	AM_10093	rs72558187	Ch10:96701715
CYP2C9	*25	CYP2C9*25_3531_3540del10	AM_10095	rs72558188	Ch10:96701970
CYP2C9	*14	CYP2C9*14_3552G>A(R125H)	AM_10097	rs72558189	Ch10:96701991
CYP2C9	*2	CYP2C9*2_3608C>T(R144C)	AM_10100	rs1799853	Ch10:96702047
CYP2C9	*15	CYP2C9*15_9100C>A(S162x)	AM_10104	rs72558190	Ch10:96707539
CYP2C9	*9	CYP2C9*9_10535A>G(H251R)	AM_10106	rs2256871	Ch10:96708974
CYP2C9	*10	CYP2C9*10_10598A>G(E272G)	AM_10107	rs9332130	Ch10:96709037
CYP2C9	*6	CYP2C9*6_10601delA(K273X)	AM_10108	rs9332131	Ch10:96709039
CYP2C9	*16	CYP2C9*16_33497A>G(T299A)	AM_10109	rs72558192	Ch10:96731936
CYP2C9	*11	CYP2C9*11_42542C>T(R335W)	AM_10111	rs28371685	Ch10:96740981
CYP2C9	*3	CYP2C9*3_42614A>C(I359L)	AM_10113	rs1057910	Ch10:96741053
CYP2C9	*4	CYP2C9*4_42615T>C(I359T)	AM_10114	rs56165452	Ch10:96741054
CYP2C9	*5	CYP2C9*5_42619C>G(D360E)	AM_10115	rs28371686	Ch10:96741058
CYP2C9	*12	CYP2C9*12_50338C>T(P489S)	AM_10121	rs9332239	Ch10:96748777
CYP2C9	Y358C	CYP2C9_42612A>G(Y358C)	AM_10112	rs1057909	Ch10:96741051
CYP2C9	N	CYP2C9_55221C>T(A441A)	AM_10119	rs2017319	Ch10:96748635
CYP2C9	N	CYP2C9_55323A>T(G475G)	AM_10120	rs1057911	Ch10:96748737
CYP2C18	Y68X	CYP2C18_c.204T>A(Y68X)	AM_10039	rs41291550	Ch10:96447562
CYP2C18	195FS	CYP2C18_c.582insT	AM_10042	rs72558183	Ch10:96454774
CYP2C18	K232E	CYP2C18_c.694A>G(K232E)	AM_10044	rs2296681	Ch10:96466592
CYP2C18	T385M	CYP2C18_c.1154C>T(T385M)	AM_10047	rs2281891	Ch10:96493058
CYP2C18	N	CYP2C18_c.*31C>T(3'UTR)	AM_10048	rs2860840	Ch10:96495232
CYP2C18	N	CYP2C18_c.*592C>A(3'UTR)	AM_10052	rs1326830	Ch10:96495793
CYP2C19	*17	CYP2C19*17_-806C>T	AM_10053	rs12248560	Ch10:96521657
CYP2C19	*4	CYP2C19*4_1A>G(M1V)	AM_10054	rs28399504	Ch10:96522463
CYP2C19	*14	CYP2C19*14_50T>C(L17P)	AM_10055	rs55752064	Ch10:96522512
CYP2C19	*15	CYP2C19*15_55A>C(I19L)	AM_10056	rs17882687	Ch10:96522517
CYP2C19	*2B	CYP2C19*2B_12460G>C(E92D)	AM_10059	rs17878459	Ch10:96534922
CYP2C19	*8	CYP2C19*8_12711T>C(W120R)	AM_10060	rs41291556	Ch10:96535173
CYP2C19	*6	CYP2C19*6_12748G>A(R132Q)	AM_10062	rs72558184	Ch10:96535210
CYP2C19	*9	CYP2C19*9_12784G>A(R144H)	AM_10064	rs17884712	Ch10:96535246
CYP2C19	*3	CYP2C19*3_17948G>A(W212X)	AM_10068	rs4986893	Ch10:96540410
CYP2C19	*10	CYP2C19*10_19153C>T(P227L)	AM_10069	rs6413438	Ch10:96541615
CYP2C19	*2	CYP2C19*2_19154G>A(P227P)	AM_10070	rs4244285	Ch10:96541616
CYP2C19	*7	CYP2C19*7_19294T>A(SpliceDefect)	AM_10072	rs72558186	Ch10:96541756
CYP2C19	*13	CYP2C19*13_87290C>T(R410C)	AM_10077	rs17879685	Ch10:96609752
CYP2C19	*5	CYP2C19*5_90033C>T(R433W)	AM_10079	rs56337013	Ch10:96612495
CYP2C19	*12	CYP2C19*12_90209A>C(X491C)	AM_10082	rs55640102	Ch10:96612671
CYP2C19	439FS	CYP2C19_90052delG	AM_10080	rs5787121	Ch10:96612514
CYP2C19	241FS	CYP2C19_721insG	AM_10071	rs72558185	Ch10:96541656
CYP2C19	V331I	CYP2C19_80161G>A(V331I)	AM_10075	rs3758581	Ch10:96602623
CYP2D6	P34S	CYP2D6_100C>T(P34S)	AM_12285	rs1065852	Ch22:42526694
CYP2D6	*12	CYP2D6*12_124G>A(G42R)	AM_12284	rs5030862	Ch22:42526670
CYP2D6	*15	CYP2D6*15_137insT	AM_12283	rs72549357	Ch22:42526657
CYP2D6	*11	CYP2D6*11_883G>C(SpliceDefect)	AM_12281	rs5030863	Ch22:42525912
CYP2D6	T107I	CYP2D6_1023C>T(T107I)	AM_12280	rs28371706	Ch22:42525772
CYP2D6	*29	CYP2D6*29_1659G>A(V136I)	AM_12278	rs61736512	Ch22:42525134
CYP2D6	*6	CYP2D6*6_1707delT(W152X)	AM_12276	rs5030655	Ch22:42525086
CYP2D6	*14,*8	CYP2D6*14or*8_1758G>A>T(G169RorX)	AM_12275	rs5030865	Ch22:42525035,Ch22:42525035
CYP2D6	*4	CYP2D6*4_1846G>A(SpliceDefect)	AM_12274	rs3892097	Ch22:42524947
CYP2D6	*40	CYP2D6*40_1863ins(TTTCGCCCC)2	AM_12272	rs72549356	Ch22:42524929
CYP2D6	*20	CYP2D6*20_1973insG	AM_12270	rs72549354	Ch22:42524819
CYP2D6	*19	CYP2D6*19_2539delAACT	AM_12268	rs72549353	Ch22:42524251
CYP2D6	*3	CYP2D6*3_2549delA(R259X)	AM_12267	rs35742686	Ch22:42524244
CYP2D6	*21	CYP2D6*21_2573insC	AM_12266	rs72549352	Ch22:42524213
CYP2D6	*38	CYP2D6*38_2587delGACT	AM_12265	rs72549351	Ch22:42524203
CYP2D6	*9	CYP2D6*9_2615delAAG	AM_12264	rs28371720	Ch22:42524178
CYP2D6	R296C	CYP2D6_2850C>T(R296C)	AM_12261	rs16947	Ch22:42523943
CYP2D6	*7	CYP2D6*7_2935A>C(H324P)	AM_12259	rs5030867	Ch22:42523858
CYP2D6	*44	CYP2D6*44_2950G>C(SpliceDefect)	AM_12258	rs72549349	Ch22:42523843
CYP2D6	*41	CYP2D6*41_2988G>A(SpliceDefect)	AM_12257	rs28371725	Ch22:42523805
CYP2D6	*29	CYP2D6*29_3183G>A(V338M)	AM_12255	rs59421388	Ch22:42523610
CYP2D6	*56	CYP2D6*56_3201C>T(R344X)	AM_12254	rs72549347	Ch22:42523592
CYP2D6	*42	CYP2D6*42_3259insGT	AM_12252	rs72549346	Ch22:42523533
CYP2D6	*18	CYP2D6*18_4125dupGTGCCCACT	AM_12248	rs1135836	Ch22:42522660
CYP2D6	N	CYP2D6_-2178G>A	AM_15506	rs28360521	Ch22:42528976
CYP2D6	N	CYP2D6_-1961C>G>A	AM_15503	N/A	Ch22:42528759,Ch22:42528759
CYP2D6	N	CYP2D6_-1770G>A	AM_15502	rs1080983	Ch22:42528568
CYP2D6	N	CYP2D6_-1584C>G	AM_12291	rs1080985	Ch22:42528382
CYP2D6	N	CYP2D6_1661G>C(V136V)	AM_12277	rs1058164	Ch22:42525132
CYP2D6	S486T	CYP2D6_4180G>C(S486T)	AM_12247	rs1135840	Ch22:42522613
CYP2E1	*5	CYP2E1*5_-1293G>C(Promoter)	AM_10240	rs3813867	Ch10:135339605
CYP2E1	*5	CYP2E1*5_-1053C>T(Promoter)	AM_10241	rs2031920	Ch10:135339845
CYP2E1	*7C	CYP2E1*7C_-352A>G(Promoter)	AM_10242	rs2070672	Ch10:135340548
CYP2E1	*7	CYP2E1*7_-333T>A(Promoter)	AM_10243	rs2070673	Ch10:135340567
CYP2E1	*7B	CYP2E1*7B_-71G>T(Promoter)	AM_10244	rs6413420	Ch10:135340829
CYP2E1	*2	CYP2E1*2_1132G>A(R76H)	AM_10249	rs72559710	Ch10:135342034
CYP2E1	*4	CYP2E1*4_4768G>A(V179I)	AM_10251	rs6413419	Ch10:135345675
CYP2E1	*3	CYP2E1*3_10023G>A(V389I)	AM_10257	rs55897648	Ch10:135351264
CYP2E1	N	CYP2E1_6498C>T(I321I)	AM_10253	rs915909	Ch10:135347397
CYP2E1	N	CYP2E1_10463T>C(F421F)	AM_10258	rs2515641	Ch10:135351362
CYP2F1	N	CYP2F1_96G>A(P32P)	AM_11456	rs305968	Ch19:41622189
CYP2F1	*4	CYP2F1*4_112T>C(S38P)	AM_11457	rs58285195	Ch19:41622205
CYP2F1	*6	CYP2F1*6_388G>C(R98P)	AM_11458	rs57670668	Ch19:41622481
CYP2F1	*3	CYP2F1*3_11887C>T(P490L)	AM_11462	rs7246981	Ch19:41633980
CYP2F1	V175L	CYP2F1_5308G>C(V175L)	AM_11459	rs2287941	Ch19:41627401
CYP2J2	*7	CYP2J2*7_-76G>T(Promoter)	AM_11637	rs890293	Ch1:60392494
CYP2J2	*2	CYP2J2*2_14488A>G(T143A)	AM_11630	rs55753213	Ch1:60377930
CYP2J2	*3	CYP2J2*3_14533C>T(R158C)	AM_11629	rs56307989	Ch1:60377885
CYP2J2	*4	CYP2J2*4_15029T>A(I192N)	AM_11627	rs66515830	Ch1:60377389
CYP2J2	*5	CYP2J2*5_21709G>A(D342N)	AM_11625	rs56053398	Ch1:60370710
CYP2J2	*6	CYP2J2*6_25662A>T(N404Y)	AM_11622	rs72547598	Ch1:60366757
CYP2J2	N	CYP2J2_10769C>G(R111R)	AM_11632	rs1056595	Ch1:60381650
CYP2J2	L378Q	CYP2J2_21818T>A(L378Q)	AM_11624	rs1056596	Ch1:60370601
CYP2J2	N	CYP2J2_33084T>A(V499V)	AM_11621	rs2228114	Ch1:60359335
CYP2S1	N	CYP2S1_1300G>A(P66P)	AM_11463	rs60694775	Ch19:41700469
CYP2S1	N	CYP2S1_1324C>G(P74P)	AM_11464	rs338599	Ch19:41700493
CYP2S1	N	CYP2S1_4624G>A(A151A)	AM_11466	rs57266494	Ch19:41703793
CYP2S1	N	CYP2S1_4594G>A(G141G)	AM_11465	rs16975056	Ch19:41703763
CYP3A4	*14	CYP3A4*14_44T>C(L15P)	AM_14835	rs12721634	Ch7:99381661
CYP3A4	*7	CYP3A4*7_6004G>A(G56D)	AM_14834	rs56324128	Ch7:99375702
CYP3A4	*4	CYP3A4*4_13871A>G(I118V)	AM_14831	rs55951658	Ch7:99367825
CYP3A4	*8	CYP3A4*8_13908G>A(R130Q)	AM_14830	rs72552799	Ch7:99367788
CYP3A4	*15	CYP3A4*15_14269G>A(R162Q)	AM_14828	rs4986907	Ch7:99367427
CYP3A4	*10	CYP3A4*10_14304G>C(D174H)	AM_14826	rs4986908	Ch7:99367392
CYP3A4	*16	CYP3A4*16_15603C>G(T185S)	AM_14825	rs12721627	Ch7:99366093
CYP3A4	*17	CYP3A4*17_15615T>C(F189S)	AM_14824	rs4987161	Ch7:99366081
CYP3A4	*5	CYP3A4*5_15702C>G(P218R)	AM_14821	rs55901263	Ch7:99365994
CYP3A4	*2	CYP3A4*2_15713T>C(S222P)	AM_14820	rs55785340	Ch7:99365983
CYP3A4	*6	CYP3A4*6_17661insA	AM_14816	rs4646438	Ch7:99364034
CYP3A4	*18	CYP3A4*18_20070T>C(L293P)	AM_14815	rs28371759	Ch7:99361626
CYP3A4	*11	CYP3A4*11_21867C>T(T363M)	AM_14812	rs67784355	Ch7:99359829
CYP3A4	*12	CYP3A4*12_21896C>T(L373F)	AM_14811	rs12721629	Ch7:99359800
CYP3A4	*13	CYP3A4*13_22026C>T(P416L)	AM_14809	rs4986909	Ch7:99359670
CYP3A4	*3	CYP3A4*3_23171T>C(M445T)	AM_14807	rs4986910	Ch7:99358524
CYP3A4	*19	CYP3A4*19_23237C>T(P467S)	AM_14804	rs4986913	Ch7:99358459
CYP3A4	*20	CYP3A4*20_25889insA	AM_14802	rs67666821	Ch7:99355806
CYP3A4	N	CYP3A4_-392A>G	AM_14846	rs2740574	Ch7:99382096
CYP3A4	K96E	CYP3A4_11451A>G(K96E)	AM_14832	rs3091339	Ch7:99370245
CYP3A4	I193V	CYP3A4_15626A>G(I193V)	AM_14823	rs3208361	Ch7:99366070
CYP3A4	S252A	CYP3A4_16898T>G(S252A)	AM_14817	rs3208363	Ch7:99364798
CYP3A4	N	CYP3A4_20230G>A	AM_14814	rs2242480	Ch7:99361466
CYP3A4	I431T	CYP3A4_23130T>C(I431T)	AM_14808	rs1041988	Ch7:99358566
CYP3A4	465FS	CYP3A4_23231insC	AM_14805	rs72552795	Ch7:99358465
CYP3A5	*8	CYP3A5*8_3699C>T(R28C)	AM_14765	rs55817950	Ch7:99273821
CYP3A5	*3B	CYP3A5*3B_3705C>T(H30Y)	AM_14764	rs28383468	Ch7:99273815
CYP3A5	*3L	CYP3A5*3L_3775A>G(Y53C)	AM_14762	rs72552791	Ch7:99273745
CYP3A5	*3	CYP3A5*3_6986A>G(SpliceDefect)	AM_14759	rs776746	Ch7:99270539
CYP3A5	*3D	CYP3A5*3D_7249T>G(L82R)	AM_14757	rs56244447	Ch7:99270276
CYP3A5	*5	CYP3A5*5_12952T>C(SpliceDefect)	AM_14753	rs55965422	Ch7:99264573
CYP3A5	*4	CYP3A5*4_14665A>G(Q200R)	AM_14749	rs56411402	Ch7:99262860
CYP3A5	*6	CYP3A5*6_14690G>A(SpliceDefect)	AM_14748	rs10264272	Ch7:99262835
CYP3A5	*9	CYP3A5*9_19386G>A(A337T)	AM_14739	rs28383479	Ch7:99258139
CYP3A5	*7	CYP3A5*7_27131insT	AM_14737	rs41303343	Ch7:99250393
CYP3A5	*2	CYP3A5*2_27289C>A(T398N)	AM_14735	rs28365083	Ch7:99250236
CYP3A5	*3K	CYP3A5*3K_29753T>C(F446S)	AM_14730	rs41279854	Ch7:99247772
CYP3A5	*3F	CYP3A5*3F_31551T>C(I488T)	AM_14726	rs28365085	Ch7:99245974
CYP3A5	S100Y	CYP3A5_7303C>A(S100Y)	AM_14756	rs41279857	Ch7:99270222
CYP3A7	*1B	CYP3A7*1B_-314C>T(Promoter)	AM_14798	rs45465393	Ch7:99333030
CYP3A7	*1C	CYP3A7*1C_-284T>A(Promoter)	AM_14796	rs45494802	Ch7:99333000
CYP3A7	*1C	CYP3A7*1C_-281A>T(Promoter)	AM_14794	rs45467892	Ch7:99332997
CYP3A7	*1C	CYP3A7*1C_-232A>C(Promoter)	AM_14791	rs45446698	Ch7:99332948
CYP3A7	*1D	CYP3A7*1D_-91G>A(Promoter)	AM_14790	rs55798860	Ch7:99332807
CYP3A7	*1E	CYP3A7*1E_-49G>A(Promoter)	AM_14789	rs28451617	Ch7:99332765
CYP3A7	*2	CYP3A7*2_26041C>G(T409R)	AM_14781	rs2257401	Ch7:99306685
CYP3A43	*3	CYP3A43*3_31867C>G(P340A)	AM_14861	rs680055	Ch7:99457605
CYP3A43	*1B	CYP3A43*1B_33518C>T(A349A)	AM_14862	rs17342647	Ch7:99459256
CYP3A43	N	CYP3A43_14956C>T	AM_14856	rs533486	Ch7:99440694
CYP3A43	N	CYP3A43_19394C>T(L114L)	AM_14857	rs4646474	Ch7:99445132
CYP3A43	M145I	CYP3A43_20053G>T(M145I)	AM_14858	rs45450092	Ch7:99445791
CYP3A43	N	CYP3A43_21503T>C(N198N)	AM_14859	rs800667	Ch7:99447241
CYP3A43	M275I	CYP3A43_28744G>A(M275I)	AM_14860	rs45621431	Ch7:99454482
CYP4B1	R173W	CYP4B1_c.517C>T(R173W)	AM_11543	rs4646487	Ch1:47279175
CYP4B1	294FS	CYP4B1_c.881_882delAT(D294X)	AM_11546	rs3215983	Ch1:47280747
CYP4B1	*4	CYP4B1*4_c.964A>G(S322G)	AM_11547	rs45467195	Ch1:47280830
CYP4B1	M331I	CYP4B1_c.993G>A(M331I)	AM_11549	rs2297810	Ch1:47280859
CYP4B1	R340C	CYP4B1_c.1018C>T(R340C)	AM_11550	rs4646491	Ch1:47280884
CYP4B1	N	CYP4B1_c.330G>A(K110K)	AM_11539	rs7513658	Ch1:47276819
CYP4B1	R375C	CYP4B1_c.1123C>T(R375C)	AM_11554	rs2297809	Ch1:47282772
CYP4F2	*2	CYP4F2*2_34T>G(W12G)	AM_11310	rs3093105	Ch19:16008388
CYP4F2	*3	CYP4F2*3_18000G>A(V433M)	AM_11299	rs2108622	Ch19:15990431
CYP4F2	W12C	CYP4F2_36G>C(W12C)	AM_11309	rs2906891	Ch19:16008386
CYP4F2	P13R	CYP4F2_38C>G(P13R)	AM_11308	rs2906890	Ch19:16008384
CYP4F2	N	CYP4F2_165A>G(P55P)	AM_11307	rs3093106	Ch19:16008257
CYP4F2	N	CYP4F2_2042A>C(G93G)	AM_11305	rs8100960	Ch19:16006380
CYP4F2	N	CYP4F2_2099C>T(N112N)	AM_11304	rs8110714	Ch19:16006323
CYP4F2	N	CYP4F2_5034C>G(A116A)	AM_11303	rs3093136	Ch19:16003388
CYP4F2	G185V	CYP4F2_7207G>T(G185V)	AM_11302	rs3093153	Ch19:16001215
CYP4F2	L278F	CYP4F2_8103C>T(L278F)	AM_11301	rs4605294	Ch19:16000319
CYP4F2	N	CYP4F2_11602C>T(H343H)	AM_11300	rs2074900	Ch19:15996820
CYP17A1	N	CYP17A1_-34T>C	AM_10206	rs743572	Ch10:104597152
CYP17A1	C22W	CYP17A1_66C>G(C22W)	AM_10203	rs762563	Ch10:104597053
CYP17A1	N	CYP17A1_138C>T(H46H)	AM_10202	rs6162	Ch10:104596981
CYP17A1	N	CYP17A1_195G>T(S65S)	AM_10201	rs6163	Ch10:104596924
CYP17A1	N	CYP17A1_4249C>T(D283D)	AM_10198	rs1042386	Ch10:104592870
CYP17A1	N	CYP17A1_6417G>A(P428P)	AM_10194	rs6164	Ch10:104590702
CYP19A1	*2	CYP19A1*2_115T>C(W39R)	AM_10749	rs2236722	Ch15:51534995
CYP19A1	*4	CYP19A1*4_27142C>T(R264C)	AM_10747	rs700519	Ch15:51507968
CYP19A1	N	CYP19A1_32124C>T(3'UTR)	AM_10744	rs10046	Ch15:51502986
CYP19A1	N	CYP19A1_32266G>T(3'UTR)	AM_10742	rs4646	Ch15:51502844
CYP19A1	N	CYP19A1_-12829G>C(5'UTR)	AM_10750	rs1062033	Ch15:51547938
CYP19A1	N	CYP19A1_5998A>G(V80V)	AM_10748	rs700518	Ch15:51529112
CYP19A1	R264H	CYP19A1_27143G>A(R264H)	AM_10746	rs2304462	Ch15:51507967
CYP19A1	N	CYP19A1_30554C>T(P408P)	AM_10745	rs2304461	Ch15:51504556
CYP19A1	N	CYP19A1_32217C>A(3'UTR)	AM_10743	rs1050677	Ch15:51502893
CYP19A1	N	CYP19A1_32812T>C(3'UTR)	AM_10741	rs1050760	Ch15:51502298
CYP19A1	N	CYP19A1_33028T>A(3'UTR)	AM_10740	rs1050787	Ch15:51502082
DCK	I24V	DCK_c.70A>G(I24V)	AM_13643	rs66878317	Ch4:71859622
DCK	A119G	DCK_c.356C>G(A119G)	AM_13644	rs66472932	Ch4:71888232
DCK	P122S	DCK_c.364C>T(P122S)	AM_13645	rs67437265	Ch4:71888240
DCK	N	DCK_c.*165C>T(3'UTR)	AM_13646	rs4643786	Ch4:71895260
DPYD	*9	DPYD*9_c.85T>C(C29R)	AM_11669	rs1801265	Ch1:98348885
DPYD	*7	DPYD*7_c.295delTCAT	AM_11668	rs72549309	Ch1:98205971
DPYD	*8	DPYD*8_c.703C>T(R235W)	AM_11663	rs1801266	Ch1:98157332
DPYD	*11	DPYD*11_c.1003G>T(V335L)	AM_11660	rs72549306	Ch1:98058899
DPYD	*4	DPYD*4_c.1601G>A(S534N)	AM_11653	rs1801158	Ch1:97981421
DPYD	*13	DPYD*13_c.1679T>G(I560S)	AM_11651	rs55886062	Ch1:97981343
DPYD	*3	DPYD*3_c.1897delC(P633X)	AM_11649	rs72549303	Ch1:97915622
DPYD	*2	DPYD*2_c.1905+1G>A	AM_11647	rs3918290	Ch1:97915614
DPYD	*9B	DPYD*9B_c.2657G>A(R886H)	AM_11643	rs1801267	Ch1:97564154
DPYD	*10	DPYD*10_c.2983G>T(V995F)	AM_11639	rs1801268	Ch1:97544627
DPYD	R21X	DPYD_c.61C>T(R21X)	AM_11670	rs72549310	Ch1:98348909
DPYD	M166V	DPYD_c.496A>G(M166V)	AM_11667	rs2297595	Ch1:98165091
DPYD	N	DPYD_c.525G>A(S175S)	AM_11666	rs6670886	Ch1:98165062
DPYD	N	DPYD_c.756T>C(G252G)	AM_11662	rs6675198	Ch1:98157279
DPYD	N	DPYD_c.1035T>C(F345F)	AM_11659	rs1042478	Ch1:98058867
DPYD	N	DPYD_c.1074T>A(R358R)	AM_11658	rs1042479	Ch1:98058828
DPYD	N	DPYD_c.1896T>C(F632F)	AM_11650	rs17376848	Ch1:97915624
DPYD	N	DPYD_c.1905C>T(N635N)	AM_11648	rs3918289	Ch1:97915615
FAAH	P129T	FAAH_c.385C>A(P129T)	AM_11525	rs324420	Ch1:46870761
FAAH	H370R	FAAH_c.1109A>G(H370R)	AM_11526	rs12094805	Ch1:46874804
FMO2	113FS	FMO2_c.337delG(V113X)	AM_11933	rs28369860	Ch1:171165803
FMO2	N413K	FMO2_c.1239T>G(N413K)	AM_11948	rs2020865	Ch1:171176912
FMO2	X472Q	FMO2_23238T>C(X472Q)	AM_11958	rs6661174	Ch1:171178090
FMO2	D36G	FMO2_c.107A>G(D36G)	AM_11925	rs2020870	Ch1:171154959
FMO2	V59I	FMO2_c.175G>A(V59I)	AM_11927	rs55708639	Ch1:171162516
FMO2	70InsD	FMO2_c.210_211insGAC(70InsD)	AM_11929	rs2020868	Ch1:171162551
FMO2	F81S	FMO2_c.242T>C(F81S)	AM_11931	rs2020860	Ch1:171162583
FMO2	F182S	FMO2_c.545T>C(F182S)	AM_11936	rs2307492	Ch1:171168545
FMO2	N	FMO2_c.585A>G(S195S)	AM_11938	rs2020861	Ch1:171168585
FMO2	R238Q	FMO2_c.713G>A(R238Q)	AM_11940	rs28369895	Ch1:171173089
FMO2	R249X	FMO2_c.745C>T(R249X)	AM_11941	rs2020866	Ch1:171173121
FMO2	E314G	FMO2_c.941A>G(E314G)	AM_11942	rs2020863	Ch1:171174531
FMO2	N	FMO2_c.1101G>A(A367A)	AM_11943	rs7536646	Ch1:171174691
FMO2	R387ins8	FMO2_c.1160_1161ins8(R387X)	AM_11944	rs72549336	Ch1:171174750
FMO2	R391T	FMO2_c.1172G>C(R391T)	AM_11945	rs28369899	Ch1:171174762
FMO2	N	FMO2_c.1206G>A(E402E)	AM_11947	rs6671692	Ch1:171176879
FMO2	N	FMO2_c.*60A>G	AM_11959	rs2020869	Ch1:171178152
FMO2	N	FMO2_c.*113_*114insT	AM_11960	rs72549337	Ch1:171178205
FMO2	N	FMO2_c.*933T>C	AM_11966	rs6664553	Ch1:171179025
FMO2	N	FMO2_c.*1195C>T	AM_11968	rs7512785	Ch1:171179287
FMO2	N	FMO2_c.*1385C>T	AM_11970	rs7515157	Ch1:171179477
FMO3	E32K	FMO3_c.94G>A(E32K)	AM_11857	rs72549320	Ch1:171061893
FMO3	A52T	FMO3_c.154G>A(A52T)	AM_11866	rs72549321	Ch1:171072947
FMO3	N61S	FMO3_c.182A>G(N61S)	AM_11867	rs72549322	Ch1:171072975
FMO3	M66I	FMO3_c.198G>T(M66I)	AM_11868	rs72549323	Ch1:171072991
FMO3	M82T	FMO3_c.245T>C(M82T)	AM_11869	rs72549324	Ch1:171073038
FMO3	D132H	FMO3_c.394G>C(D132H)	AM_11871	rs12072582	Ch1:171076888
FMO3	N	FMO3_c.441C>T(S147S)	AM_11872	rs1800822	Ch1:171076935
FMO3	G148X	FMO3_c.442G>T(G148X)	AM_11873	rs72549325	Ch1:171076936
FMO3	P153L	FMO3_c.458C>T(P153L)	AM_11874	rs72549326	Ch1:171076952
FMO3	E158K	FMO3_c.472G>A(E158K)	AM_11875	rs2266782	Ch1:171076966
FMO3	I199N	FMO3_c.596T>A(I199N)	AM_11877	rs72549327	Ch1:171077331
FMO3	202FS	FMO3_c.604_605insT(E202X)	AM_11878	rs72549328	Ch1:171077339
FMO3	N	FMO3_c.627+10C>G	AM_11880	rs2066534	Ch1:171077372
FMO3	N	FMO3_c.717T>C(F239F)	AM_11884	rs1050902	Ch1:171080028
FMO3	V257M	FMO3_c.769G>A(V257M)	AM_11885	rs1736557	Ch1:171080080
FMO3	V277A	FMO3_c.830T>C(V277A)	AM_11887	rs2066530	Ch1:171083149
FMO3	N	FMO3_c.855C>T(N285N)	AM_11888	rs909530	Ch1:171083174
FMO3	N	FMO3_c.906C>T(N302N)	AM_11889	rs2066536	Ch1:171083225
FMO3	E305X	FMO3_c.913G>T(E305X)	AM_11890	rs61753344	Ch1:171083232
FMO3	E308G	FMO3_c.923A>G(E308G)	AM_11891	rs2266780	Ch1:171083242
FMO3	E314X	FMO3_c.940G>T(E314X)	AM_11892	rs72549330	Ch1:171083259
FMO3	L360P	FMO3_c.1079T>C(L360P)	AM_11893	rs28363581	Ch1:171083398
FMO3	E362Q	FMO3_c.1084G>C(E362Q)	AM_11894	rs2066532	Ch1:171083403
FMO3	R387L	FMO3_c.1160G>T(R387L)	AM_11895	rs72549331	Ch1:171083479
FMO3	I486M	FMO3_c.1458A>G(I486M)	AM_11902	rs1050906	Ch1:171086441
FMO3	R492W	FMO3_c.1474C>T(R492W)	AM_11903	rs72549334	Ch1:171086457
FMO3	G503R	FMO3_c.1507G>A(G503R)	AM_11905	rs72549335	Ch1:171086490
GSTM1	*B	GSTM1*B_c.519G>C(K173N)	AM_11707	rs74837985	Ch1:110233138
GSTM1	N	GSTM1_c.178-78T>C	AM_11705	rs737497	Ch1:110231592
GSTP1	*B	GSTP1*B_c.313A>G(I105V)	AM_10440	rs1695	Ch11:67352689
GSTP1	*C	GSTP1*C_c.341C>T(A114V)	AM_10442	rs1138272	Ch11:67353579
GSTP1	N	GSTP1_c.-18G>A(Promoter)	AM_10430	rs8191439	Ch11:67351297
GSTP1	N	GSTP1_c.21C>G(V7V)	AM_10434	rs8191444	Ch11:67351624
GSTP1	D147Y	GSTP1_c.439G>T(D147Y)	AM_10444	rs4986949	Ch11:67353677
GSTT1	*B	GSTT1*B_c.310A>C(T104P)	AM_12242	rs11550605	Ch22:24379402
GSTT1	A21T	GSTT1_c.61G>A(A21T)	AM_12245	rs2266635	Ch22:24384171
GSTT1	F45C	GSTT1_c.134T>G(F45C)	AM_12243	rs17856199	Ch22:24381766
GSTT1	N	GSTT1_c.354G>A(V118V)	AM_12241	rs2266636	Ch22:24376996
GSTT1	V169I	GSTT1_c.505G>A(V169I)	AM_12239	rs2266637	Ch22:24376845
NAT1	*11	NAT1*11_c.-344C>T	AM_14965	rs4986988	Ch8:18079213
NAT1	*11	NAT1*11_c.-40A>T	AM_14966	rs4986989	Ch8:18079517
NAT1	*27	NAT1*27_c.21T>G(L7L)	AM_14968	rs4986992	Ch8:18079577
NAT1	*19	NAT1*19_c.97C>T(R33X)	AM_14969	rs56318881	Ch8:18079653
NAT1	R64W	NAT1_c.190C>T(R64W)	AM_14970	rs56379106	Ch8:18079746
NAT1	*5	NAT1*5_c.350GG>CC(R117T)	AM_14971	rs72554606	Ch8:18079906
NAT1	V149I	NAT1_c.445G>A(V149I)	AM_14974	rs4987076	Ch8:18080001
NAT1	*11	NAT1*11_c.459G>A(T153T)	AM_14975	rs4986990	Ch8:18080015
NAT1	*5	NAT1*5_c.497GGG>CCC(RE166TQ)	AM_14976	rs72554608	Ch8:18080053
NAT1	*15	NAT1*15_c.559C>T(R187X)	AM_14977	rs5030839	Ch8:18080115
NAT1	*14	NAT1*14_c.560G>A(R187Q)	AM_14978	rs4986782	Ch8:18080116
NAT1	*11	NAT1*11_c.640T>G(S214A)	AM_14981	rs4986783	Ch8:18080196
NAT1	*22	NAT1*22_c.752A>T(D251V)	AM_14982	rs56172717	Ch8:18080308
NAT1	N	NAT1_c.777T>C(S259S)	AM_14983	rs4986991	Ch8:18080333
NAT1	*5	NAT1*5_884A>G(3'UTR)	AM_14986	rs55793712	Ch8:18080440
NAT1	*5	NAT1*5_976delA(3'UTR)	AM_14988	rs72554612	Ch8:18080532
NAT1	N	NAT1_c.-11982A>T	AM_14963	rs72554605	Ch8:18067575
NAT1	N	NAT1_c.363C>T(V121V)	AM_14973	rs8190858	Ch8:18079919
NAT1	T207I	NAT1_c.620C>T(T207I)	AM_14980	rs4987195	Ch8:18080176
NAT1	N	NAT1_931C>T(3'UTR)	AM_14987	rs4986994	Ch8:18080487
NAT1	N	NAT1_1191G>T(3'UTR)	AM_14993	rs4986993	Ch8:18080747
NAT2	*19	NAT2*19_c.190C>T(R64W)	AM_14998	rs1805158	Ch8:18257703
NAT2	*14	NAT2*14_c.191G>A(R64Q)	AM_14999	rs1801279	Ch8:18257704
NAT2	*5	NAT2*5_c.341T>C(I114T)	AM_15001	rs1801280	Ch8:18257854
NAT2	*12D	NAT2*12D_c.364G>A(D122N)	AM_15002	rs4986996	Ch8:18257877
NAT2	*17	NAT2*17_c.434A>C(Q145P)	AM_15005	rs72554616	Ch8:18257947
NAT2	*10	NAT2*10_c.499G>A(E167K)	AM_15007	rs72554617	Ch8:18258012
NAT2	*6	NAT2*6_c.590G>A(R197Q)	AM_15008	rs1799930	Ch8:18258103
NAT2	*18	NAT2*18_c.845A>C(K282T)	AM_15011	rs56054745	Ch8:18258358
NAT2	*7	NAT2*7_c.857G>A(G286E)	AM_15012	rs1799931	Ch8:18258370
NAT2	N	NAT2_c.111T>C(F37F)	AM_14997	rs72554615	Ch8:18257624
NAT2	N	NAT2_c.282C>T(Y94Y)	AM_15000	rs1041983	Ch8:18257795
NAT2	L137F	NAT2_c.411A>T(L137F)	AM_15004	rs4986997	Ch8:18257924
NAT2	N	NAT2_c.481C>T(L161L)	AM_15006	rs1799929	Ch8:18257994
NAT2	N	NAT2_c.759C>T(V253V)	AM_15009	rs56011192	Ch8:18258272
NAT2	K268R	NAT2_c.803A>G(K268R)	AM_15010	rs1208	Ch8:18258316
PTGIS	*3	PTGIS*3_c.354T>A(S118R)	AM_12133	rs5622	Ch20:48164401
PTGIS	N	PTGIS_c.1117C>A(R373R)	AM_12126	rs5629	Ch20:48129706
PTGIS	*4	PTGIS*4_c.1135C>A(R379S)	AM_12125	rs56195291	Ch20:48129688
PTGIS	N	PTGIS_c.258G>T(V86V)	AM_12134	rs5621	Ch20:48164497
PTGIS	Q134H	PTGIS_c.402G>T(Q134H)	AM_12132	rs6067121	Ch20:48160961
PTGIS	E154A	PTGIS_c.461A>C(E154A)	AM_12131	rs5623	Ch20:48160902
PTGIS	F171L	PTGIS_c.511T>C(F171L)	AM_12130	rs5624	Ch20:48160852
PTGIS	N	PTGIS_c.591C>T(R197R)	AM_12129	rs5625	Ch20:48156189
PTGIS	R236C	PTGIS_c.706C>T(R236C)	AM_12128	rs5626	Ch20:48140744
PTGIS	N	PTGIS_c.723A>G(L241L)	AM_12127	rs5627	Ch20:48140727
PTGIS	N	PTGIS_c.1239C>T(D413D)	AM_12124	rs5630	Ch20:48127684
PTGIS	P500S	PTGIS_c.1498C>T(P500S)	AM_12123	rs5584	Ch20:48124462
SLC15A1	N	SLC15A1_c.22-40G>C	AM_10664	rs8187819	Ch13:99378743
SLC15A1	V21I	SLC15A1_c.61G>A(V21I)	AM_10663	rs8187818	Ch13:99378664
SLC15A1	F28Y	SLC15A1_c.83T>A(F28Y)	AM_10662	rs8187817	Ch13:99378642
SLC15A1	N	SLC15A1_c.258G>A(S86S)	AM_10661	rs8187823	Ch13:99376273
SLC15A1	N	SLC15A1_c.330C>T(N110N)	AM_10660	rs8187822	Ch13:99376201
SLC15A1	S117N	SLC15A1_c.350G>A(S117N)	AM_10659	rs2297322	Ch13:99376181
SLC15A1	S117R	SLC15A1_c.351C>A(S117R)	AM_10658	rs8187821	Ch13:99376180
SLC15A1	N	SLC15A1_c.1179C>T(N393N)	AM_10653	rs8187836	Ch13:99358478
SLC15A1	G419A	SLC15A1_c.1256G>C(G419A)	AM_10652	rs4646227	Ch13:99358401
SLC15A1	441FS	SLC15A1_c.1321insT	AM_10651	rs72547504	Ch13:99356637
SLC15A1	N	SLC15A1_c.1347T>C(A449A)	AM_10650	rs1339067	Ch13:99356612
SLC15A1	V450I	SLC15A1_c.1348G>A(V450I)	AM_10649	rs2274828	Ch13:99356611
SLC15A1	T451N	SLC15A1_c.1352C>A(T451N)	AM_10648	rs8187838	Ch13:99356607
SLC15A1	R459C	SLC15A1_c.1375C>T(R459C)	AM_10647	rs2274827	Ch13:99356584
SLC15A1	N	SLC15A1_c.1446A>G(E482E)	AM_10645	rs8187828	Ch13:99354754
SLC15A1	N	SLC15A1_c.1527C>T(N509N)	AM_10644	rs8187832	Ch13:99340771
SLC15A1	P537S	SLC15A1_c.1609C>T(P537S)	AM_10643	rs8187830	Ch13:99340576
SLC15A1	P586L	SLC15A1_c.1757C>T(P586L)	AM_10642	rs56120058	Ch13:99339905
SLC15A1	N	SLC15A1_c.1848G>A(S616S)	AM_10641	rs8187840	Ch13:99338531
SLC15A2	L350F	SLC15A2_c.1048C>T(L350F)	AM_13300	rs2257212	Ch3:121643804
SLC15A2	P409S	SLC15A2_c.1225C>T(P409S)	AM_13306	rs1143671	Ch3:121647286
SLC15A2	R509K	SLC15A2_c.1526G>A(R509K)	AM_13307	rs1143672	Ch3:121648168
SLC15A2	N	SLC15A2_c.141C>T(A47A)	AM_13282	rs1143669	Ch3:121615288
SLC15A2	R57H	SLC15A2_c.170G>A(R57H)	AM_13283	rs1920305	Ch3:121615317
SLC15A2	N	SLC15A2_c.852G>A(A284A)	AM_13298	rs2293616	Ch3:121641693
SLC15A2	N	SLC15A2_c.1161A>G(A387A)	AM_13301	rs1143670	Ch3:121646641
SLC15A2	M704L	SLC15A2_c.2110A>C(M704L)	AM_13315	rs1920314	Ch3:121659774
SLC15A2	N	SLC15A2_c.*6C>T(3'UTR)	AM_13316	rs1920313	Ch3:121659860
SLC15A2	N	SLC15A2_c.*146T>G(3'UTR)	AM_13318	rs4388019	Ch3:121660000
SLC22A1	S14F	SLC22A1_c.41C>T(S14F)	AM_14342	rs34447885	Ch6:160543008
SLC22A1	19FS	SLC22A1_c.54insC	AM_14343	rs72552761	Ch6:160543021
SLC22A1	L23V	SLC22A1_c.67C>G(L23V)	AM_14344	rs34570655	Ch6:160543034
SLC22A1	G38D	SLC22A1_c.113G>A(G38D)	AM_14345	rs35888596	Ch6:160543080
SLC22A1	N	SLC22A1_c.156T>C(S52S)	AM_14347	rs1867351	Ch6:160543123
SLC22A1	R61C	SLC22A1_c.181C>T(R61C)	AM_14348	rs12208357	Ch6:160543148
SLC22A1	L85F	SLC22A1_c.253C>T(L85F)	AM_14349	rs35546288	Ch6:160543220
SLC22A1	C88R	SLC22A1_c.262T>C(C88R)	AM_14350	rs55918055	Ch6:160543229
SLC22A1	F160L	SLC22A1_c.480C>G(F160L)	AM_14351	rs683369	Ch6:160551204
SLC22A1	S189L	SLC22A1_c.566C>T(S189L)	AM_14353	rs34104736	Ch6:160553314
SLC22A1	G220V	SLC22A1_c.659G>T(G220V)	AM_14354	rs36103319	Ch6:160553407
SLC22A1	P283L	SLC22A1_c.848C>T(P283L)	AM_14357	rs4646277	Ch6:160557260
SLC22A1	R287G	SLC22A1_c.859C>G(R287G)	AM_14358	rs4646278	Ch6:160557271
SLC22A1	P341L	SLC22A1_c.1022C>T(P341L)	AM_14359	rs2282143	Ch6:160557643
SLC22A1	G401S	SLC22A1_c.1201G>A(G401S)	AM_14361	rs34130495	Ch6:160560824
SLC22A1	N	SLC22A1_c.1209C>T(I403I)	AM_14362	rs35373824	Ch6:160560832
SLC22A1	V408M	SLC22A1_c.1222G>A(V408M)	AM_14363	rs628031	Ch6:160560845
SLC22A1	M420del	SLC22A1_c.1260_1262delGAT(M420del)	AM_14368	rs72552763	Ch6:160560883
SLC22A1	M440I	SLC22A1_c.1320G>A(M440I)	AM_14371	rs35956182	Ch6:160564616
SLC22A1	V461I	SLC22A1_c.1381G>A(V461I)	AM_14372	rs34295611	Ch6:160564677
SLC22A1	G465R	SLC22A1_c.1393G>A(G465R)	AM_14373	rs34059508	Ch6:160575837
SLC22A1	R488M	SLC22A1_c.1463G>T(R488M)	AM_14374	rs35270274	Ch6:160575907
SLC22A1	N	SLC22A1_c.1647A>C(S549S)	AM_14376	rs16891138	Ch6:160579596
SLC22A1	N	SLC22A1_c.*15G>A(3'UTR)	AM_14377	rs9457846	Ch6:160579629
SLC22A1	N	SLC22A1_c.*23G>A(3'UTR)	AM_14379	rs34108432	Ch6:160579637
SLC22A2	45FS	SLC22A2_c.134insA	AM_14403	rs72552765	Ch6:160679656
SLC22A2	P54S	SLC22A2_c.160C>T(P54S)	AM_14402	rs8177504	Ch6:160679630
SLC22A2	N	SLC22A2_c.390G>T(T130T)	AM_14401	rs624249	Ch6:160679400
SLC22A2	*5	SLC22A2*5_c.481T>C(F161L)	AM_14400	rs8177509	Ch6:160677683
SLC22A2	M165V	SLC22A2_c.493A>G(M165V)	AM_14399	rs8177508	Ch6:160677671
SLC22A2	M165I	SLC22A2_c.495G>A(M165I)	AM_14398	rs8177507	Ch6:160677669
SLC22A2	*8	SLC22A2*8_c.669C>T(I223I)	AM_14396	rs8177510	Ch6:160671584
SLC22A2	A270S	SLC22A2_c.808G>T(A270S)	AM_14395	rs316019	Ch6:160670282
SLC22A2	A297G	SLC22A2_c.890C>G(A297G)	AM_14394	rs8177513	Ch6:160668283
SLC22A2	*7	SLC22A2*7_c.1198C>T(R400C)	AM_14392	rs8177516	Ch6:160664685
SLC22A2	N	SLC22A2_c.1203C>T(I401I)	AM_14391	rs8177515	Ch6:160664680
SLC22A2	K432Q	SLC22A2_c.1294A>C(K432Q)	AM_14390	rs8177517	Ch6:160663420
SLC22A2	N	SLC22A2_c.1398C>T(G466G)	AM_14388	rs8177520	Ch6:160662609
SLC22A2	N	SLC22A2_c.1506A>G(V502V)	AM_14386	rs316003	Ch6:160645832
SLC22A2	N	SLC22A2_c.1587C>T(A529A)	AM_14385	rs8177521	Ch6:160645751
SLC22A2	R463K	SLC22A2_c.1388G>A(R463K)	AM_14389	rs3907239	Ch6:160663326
SLC22A6	G14S	SLC22A6_c.40G>A(G14S)	AM_10348	rs72559735	Ch11:62752123
SLC22A6	R50H	SLC22A6_c.149G>A(R50H)	AM_10347	rs11568626	Ch11:62752014
SLC22A6	57FS	SLC22A6_c.169delC(L57X)	AM_10346	rs67264610	Ch11:62751994
SLC22A6	I226T	SLC22A6_c.677T>C(I226T)	AM_10340	rs11568623	Ch11:62749434
SLC22A6	A256V	SLC22A6_c.767C>T(A256V)	AM_10339	rs11568624	Ch11:62749344
SLC22A6	R293W	SLC22A6_c.877C>T(R293W)	AM_10337	rs45607933	Ch11:62748776
SLC22A6	R454Q	SLC22A6_c.1361G>A(R454Q)	AM_10335	rs11568634	Ch11:62746960
SLCO1A2	I13T	SLCO1A2_c.38T>C(I13T)	AM_10542	rs10841795	Ch12:21487544
SLCO1A2	N	SLCO1A2_c.61-5605T>A	AM_10540	rs7957203	Ch12:21477462
SLCO1A2	N	SLCO1A2_c.61-5126T>C	AM_10539	rs4078	Ch12:21476983
SLCO1A2	N	SLCO1A2_c.61-4734C>T	AM_10538	rs7484455	Ch12:21476591
SLCO1A2	N	SLCO1A2_c.61-3770A>G	AM_10537	rs7298982	Ch12:21475627
SLCO1A2	N	SLCO1A2_c.61-3234G>A	AM_10536	rs7312628	Ch12:21475091
SLCO1A2	N128Y	SLCO1A2_c.382A>T(N128Y)	AM_10534	rs11568567	Ch12:21459876
SLCO1A2	N135I	SLCO1A2_c.404A>T(N135I)	AM_10533	rs45502302	Ch12:21459854
SLCO1A2	R168C	SLCO1A2_c.502C>T(R168C)	AM_10532	rs11568564	Ch12:21457448
SLCO1A2	E172D	SLCO1A2_c.516A>C(E172D)	AM_10531	rs11568563	Ch12:21457434
SLCO1A2	T277N	SLCO1A2_c.830C>A(T277N)	AM_10528	rs11568553	Ch12:21453362
SLCO1A2	278FS	SLCO1A2_c.833delA(N278X)	AM_10527	rs11568555	Ch12:21453359
SLCO1A2	I281V	SLCO1A2_c.841A>G(I281V)	AM_10526	rs11568551	Ch12:21453351
SLCO1A2	L323P	SLCO1A2_c.968T>C(L323P)	AM_10525	rs11568579	Ch12:21450445
SLCO1A2	I355V	SLCO1A2_c.1063A>G(I355V)	AM_10524	rs45628437	Ch12:21450350
SLCO1A2	T668S	SLCO1A2_c.2003C>G(T668S)	AM_10518	rs11568557	Ch12:21422492
SLCO1B1	*17	SLCO1B1*17_c.-11187G>A(Promoter)	AM_10493	rs4149015	Ch12:21283322
SLCO1B1	*2	SLCO1B1*2_c.217T>C(F73L)	AM_10494	rs56101265	Ch12:21325716
SLCO1B1	V82A	SLCO1B1_c.245T>C(V82A)	AM_10495	rs56061388	Ch12:21327529
SLCO1B1	N130D	SLCO1B1*1B_c.388A>G(N130D)	AM_10496	rs2306283	Ch12:21329738
SLCO1B1	*16	SLCO1B1*16_c.452A>G(N151S)	AM_10497	rs2306282	Ch12:21329802
SLCO1B1	*4	SLCO1B1*4_c.463C>A(P155T)	AM_10498	rs11045819	Ch12:21329813
SLCO1B1	*3	SLCO1B1*3_c.467A>G(E156G)	AM_10499	rs72559745	Ch12:21329817
SLCO1B1	*5	SLCO1B1*5_c.521T>C(V174A)	AM_10500	rs4149056	Ch12:21331549
SLCO1B1	*18	SLCO1B1*18_c.578T>G(L193R)	AM_10502	rs72559746	Ch12:21331606
SLCO1B1	*6	SLCO1B1*6_c.1058T>C(I353T)	AM_10509	rs55901008	Ch12:21353529
SLCO1B1	*7	SLCO1B1*7_c.1294A>G(N432D)	AM_10512	rs56387224	Ch12:21355583
SLCO1B1	*8	SLCO1B1*8_c.1385A>G(D462G)	AM_10513	rs72559748	Ch12:21358855
SLCO1B1	*9	SLCO1B1*9_c.1463G>C(G488A)	AM_10514	rs59502379	Ch12:21358933
SLCO1B1	*10	SLCO1B1*10_c.1964A>G(D655G)	AM_10516	rs56199088	Ch12:21392011
SLCO1B1	*11	SLCO1B1*11_c.2000A>G(E667G)	AM_10517	rs55737008	Ch12:21392047
SLCO1B1	N	SLCO1B1_c.571T>C(L191L)	AM_10501	rs4149057	Ch12:21331599
SLCO1B1	N	SLCO1B1_c.597C>T(F199F)	AM_10503	rs2291075	Ch12:21331625
SLCO1B1	P336R	SLCO1B1_c.1007C>G(P336R)	AM_10508	rs72559747	Ch12:21353478
SLCO1B3	A112S	SLCO1B3_c.334G>T(A112S)	AM_10481	rs4149117	Ch12:21011480
SLCO1B3	I233M	SLCO1B3_c.699A>G(I233M)	AM_10482	rs7311358	Ch12:21015760
SLCO1B3	281FS	SLCO1B3_c.841delA(K281X)	AM_10484	N/A	Ch12:21028282
SLCO1B3	N	SLCO1B3_c.1272A>G(L424L)	AM_10485	rs4149143	Ch12:21032506
SLCO1B3	N	SLCO1B3_c.1557G>A(A519A)	AM_10487	rs2053098	Ch12:21036411
SLCO1B3	N	SLCO1B3_c.1833A>G(G611G)	AM_10490	rs3764006	Ch12:21054369
SLCO1B3	695FS	SLCO1B3_c.2083insC	AM_10492	rs72559744	Ch12:21069155
SLCO2B1	*2	SLCO2B1*2_c.1175C>T(T392I)	AM_10458	rs1621378	Ch11:74904362
SLCO2B1	N	SLCO2B1_c.405G>A(P135P)	AM_10454	rs1109407	Ch11:74876951
SLCO2B1	D215V	SLCO2B1_c.644A>T(D215V)	AM_10456	rs72559740	Ch11:74880413
SLCO2B1	N	SLCO2B1_c.1434-138G>T	AM_10460	rs2306167	Ch11:74907421
SLCO2B1	N	SLCO2B1_c.1512C>T(C504C)	AM_10462	rs59305495	Ch11:74907637
SULT1A1	*2	SULT1A1*2_c.638G>A(R213H)	AM_11005	rs9282861	Ch16:28617514
SULT1A1	*3	SULT1A1*3_c.667A>G(M223V)	AM_11004	rs1801030	Ch16:28617485
SULT1A2	T7I	SULT1A2_c.20C>T(T7I)	AM_10997	rs1136703	Ch16:28607232
SULT1A2	P19L	SULT1A2_c.56C>T(P19L)	AM_10996	rs10797300	Ch16:28607196
SULT1A2	N235T	SULT1A2_c.704A>C(N235T)	AM_10989	rs1059491	Ch16:28603655
SULT1A2	N239S	SULT1A2_c.716A>G(N239S)	AM_10988	rs45472392	Ch16:28603643
SULT1A3	P101L,P101H	SULT1A3_C>T>A(P101LorH)_alternate	AM_11016	rs67944833	Ch16:29473201,Ch16:29473201
SULT1A3	R144C	SULT1A3_C>T(R144C)_alternate	AM_11017	rs67878449	Ch16:29474723
SULT1A3	K234N	SULT1A3_G>T(K234N)_alternate	AM_11018	rs35044222	Ch16:29475588
SULT1A3	P101L,P101H	SULT1A3_C>T>A(P101LorH)	AM_11027	rs67944833	Ch16:30212544,Ch16:30212544
SULT1A3	R144C	SULT1A3_C>T(R144C)	AM_11028	rs67878449	Ch16:30214068
SULT1A3	K234N	SULT1A3_G>T(K234N)	AM_11029	rs35044222	Ch16:30214933
TBXAS1	*2	TBXAS1*2_c.182G>A(R61H)	AM_14917	rs6138	Ch7:139572123
TBXAS1	*1B	TBXAS1*1B_c.360G>A(S120S)	AM_14918	rs41275018	Ch7:139636013
TBXAS1	*3	TBXAS1*3_c.483C>A(D161E)	AM_14920	rs5768	Ch7:139653196
TBXAS1	*4	TBXAS1*4_c.737A>G(N246S)	AM_14923	rs55856189	Ch7:139657478
TBXAS1	*5	TBXAS1*5_c.1069C>G(L357V)	AM_14928	rs4529	Ch7:139661964
TBXAS1	*6	TBXAS1*6_c.1249C>G(Q417E)	AM_14932	rs4528	Ch7:139715542
TBXAS1	*7	TBXAS1*7_c.1348G>A(E450K)	AM_14936	rs8192868	Ch7:139715641
TBXAS1	*8	TBXAS1*8_c.1352C>A(T451N)	AM_14937	rs5763	Ch7:139715645
TBXAS1	*9	TBXAS1*9_c.1397G>A(R466Q)	AM_14939	rs41311778	Ch7:139717500
TBXAS1	*1D	TBXAS1*1D_c.*121G>A(3'UTR)	AM_14941	rs56091454	Ch7:139720020
TBXAS1	V125I	TBXAS1_c.373G>A(V125I)	AM_14919	rs8192833	Ch7:139636026
TBXAS1	L163I	TBXAS1_c.487C>A(L163I)	AM_14921	rs6137	Ch7:139653200
TBXAS1	N	TBXAS1_c.585C>G(A195A)	AM_14922	rs1042561	Ch7:139655300
TBXAS1	K258E	TBXAS1_c.772A>G(K258E)	AM_14924	rs5769	Ch7:139657513
TBXAS1	R261G	TBXAS1_c.781A>G(R261G)	AM_14925	rs5770	Ch7:139657522
TBXAS1	Q317K	TBXAS1_c.949C>A(Q317K)	AM_14926	rs5771	Ch7:139661844
TBXAS1	I332T	TBXAS1_c.995T>C(I332T)	AM_14927	rs6140	Ch7:139661890
TBXAS1	E388K	TBXAS1_c.1162G>A(E388K)	AM_14929	rs3735354	Ch7:139706915
TBXAS1	G390V	TBXAS1_c.1169G>T(G390V)	AM_14930	rs5760	Ch7:139706922
TBXAS1	N	TBXAS1_c.1206G>A(L402L)	AM_14931	rs5761	Ch7:139706959
TBXAS1	R425C	TBXAS1_c.1273C>T(R425C)	AM_14933	rs5762	Ch7:139715566
TBXAS1	A430T	TBXAS1_c.1288G>A(A430T)	AM_14934	rs4526	Ch7:139715581
TBXAS1	N	TBXAS1_c.1305C>T(A435A)	AM_14935	rs4527	Ch7:139715598
TBXAS1	N	TBXAS1_c.1384C>A(R462R)	AM_14938	rs5764	Ch7:139717487
TBXAS1	R502Q	TBXAS1_c.1505G>A(R502Q)	AM_14940	rs8192864	Ch7:139717608
TPMT	*2	TPMT*2_c.238G>C(A80P)	AM_13986	rs1800462	Ch6:18143955
TPMT	E98X	TPMT_c.292G>T(E98X)	AM_13985	rs72552739	Ch6:18143901
TPMT	*3B	TPMT*3B_c.460G>A(A154T)	AM_13980	rs1800460	Ch6:18139228
TPMT	*24	TPMT*24_c.537G>T(Q179H)	AM_13978	rs6921269	Ch6:18134078
TPMT	*4	TPMT*4_c.626-1G>A(SpliceDefect)	AM_13977	rs1800584	Ch6:18131012
TPMT	*8	TPMT*8_c.644G>A(R215H)	AM_13976	rs56161402	Ch6:18130993
TPMT	*3C	TPMT*3C_c.719A>G(Y240C)	AM_13973	rs1142345	Ch6:18130918
TPMT	N	TPMT_c.474C>T(I158I)	AM_13979	rs2842934	Ch6:18139214
UGT1ACOMMON	*76	UGT1A1*76_c.*211C>T(3'UTR)	AM_13067	rs10929303	Ch2:234681416
UGT1ACOMMON	*78	UGT1A1*78_c.*339C>G(3'UTR)	AM_13068	rs1042640	Ch2:234681544
UGT1ACOMMON	*79	UGT1A1*79_c.*440C>G(3'UTR)	AM_13070	rs8330	Ch2:234681645
UGT1ACOMMON	*11	UGT1A1*11_c.923G>A(G308E)	AM_13043	rs62625011	Ch2:234675738
UGT1ACOMMON	*9	UGT1A1*9_c.992A>G(Q331R)	AM_13044	rs72551348	Ch2:234675807
UGT1ACOMMON	*10	UGT1A1*10_c.1021C>T(R341X)	AM_13045	rs72551349	Ch2:234676519
UGT1ACOMMON	*4	UGT1A1*4_c.1069C>T(Q357X)	AM_13046	rs72551350	Ch2:234676567
UGT1ACOMMON	*16	UGT1A1*16_c.1070A>G(Q357R)	AM_13047	rs72551351	Ch2:234676568
UGT1ACOMMON	*29	UGT1A1*29_c.1099C>G(R367G)	AM_13049	rs55750087	Ch2:234676880
UGT1ACOMMON	*20	UGT1A1*20_c.1102G>A(A368T)	AM_13050	rs72551352	Ch2:234676883
UGT1ACOMMON	*3	UGT1A1*3_c.1124C>T(S375F)	AM_13051	rs72551353	Ch2:234676905
UGT1ACOMMON	*17	UGT1A1*17_c.1143C>G(S381R)	AM_13052	rs72551354	Ch2:234676924
UGT1ACOMMON	*18	UGT1A1*18_c.1201G>C(A401P)	AM_13053	rs72551355	Ch2:234676982
UGT1ACOMMON	*24	UGT1A1*24_c.1309A>T(K437X)	AM_13057	rs72551357	Ch2:234680912
UGT1ACOMMON	N	UGT1A1_c.1428C>T(P476P)	AM_13060	rs28900406	Ch2:234681031
UGT1ACOMMON	*55	UGT1A1*55_c.1487T>A(L496X)	AM_13063	rs72551361	Ch2:234681090
UGT1ACOMMON	A511P	UGT1A1_c.1531G>C(A511P)	AM_13064	rs1042709	Ch2:234681134
UGT1A1	*60	UGT1A1*60_c.-3279T>G(Promoter)	AM_13018	rs4124874	Ch2:234665659
UGT1A1	*93	UGT1A1*93_c.-3156G>A(Promoter)	AM_13019	rs10929302	Ch2:234665782
UGT1A1	*28	UGT1A1*28_c.TATA-box(Promoter)	AM_13024	rs8175347	Ch2:234668881
UGT1A1	*6	UGT1A1*6_c.211G>A(G71R)	AM_13030	rs4148323	Ch2:234669144
UGT1A1	*27	UGT1A1*27_c.686C>A(P229Q)	AM_13037	rs35350960	Ch2:234669619
UGT1A1	N	UGT1A1_c.-2950A>G	AM_13020	rs111741722	Ch2:234665983
UGT1A1	*112	UGT1A1*112_c.-1353A>C	AM_13021	rs3755319	Ch2:234667582
UGT1A1	*80	UGT1A1*80_c.-364C>T	AM_13022	rs887829	Ch2:234668570
UGT1A1	*45	UGT1A1*45_c.222C>A(Y74X)	AM_13031	rs72551340	Ch2:234669155
UGT1A1	*62	UGT1A1*62_c.247T>C(F83L)	AM_13032	rs56059937	Ch2:234669180
UGT1A1	*12	UGT1A1*12_c.524T>A(L175Q)	AM_13033	rs72551341	Ch2:234669457
UGT1A1	*15	UGT1A1*15_c.529T>C(C177R)	AM_13034	rs72551342	Ch2:234669462
UGT1A1	*8	UGT1A1*8_c.625C>T(R209W)	AM_13035	rs72551343	Ch2:234669558
UGT1A1	*43	UGT1A1*43_c.698T>G(L233R)	AM_13038	rs72551344	Ch2:234669631
UGT1A1	*14	UGT1A1*14_c.826G>C(G276R)	AM_13040	rs72551345	Ch2:234669759
UGT1A3	*5	UGT1A3*5_c.17A>G(Q6R)	AM_13004	rs28898617	Ch2:234637789
UGT1A3	W11R	UGT1A3_c.31T>C(W11R)	AM_13005	rs3821242	Ch2:234637803
UGT1A3	*4	UGT1A3*4_c.133C>T(R45W)	AM_13008	rs45625338	Ch2:234637905
UGT1A3	N	UGT1A3_c.81G>A(E27E)	AM_13007	rs6706232	Ch2:234637853
UGT1A3	N	UGT1A3_c.477A>G(A159A)	AM_13011	rs7574296	Ch2:234638249
UGT1A3	177FS	UGT1A3_c.529delC(P177X)	AM_13012	rs72551338	Ch2:234638301
UGT1A4	*2	UGT1A4*2_c.70C>A(P24T)	AM_12991	rs6755571	Ch2:234627536
UGT1A4	207FS	UGT1A4_c.621delC(F207X)	AM_12999	rs68014726	Ch2:234628087
UGT1A5	T78A	UGT1A5_c.232A>G(T78A)	AM_12980	rs72551334	Ch2:234621869
UGT1A5	N	UGT1A5_c.285T>C(G95G)	AM_12981	rs17874942	Ch2:234621922
UGT1A5	H142N	UGT1A5_c.424C>A(H142N)	AM_12982	rs3755320	Ch2:234622061
UGT1A5	207FS	UGT1A5_c.621delC(F207X)	AM_12986	rs72551335	Ch2:234622258
UGT1A6	S7A	UGT1A6_c.19T>G(S7A)	AM_12969	rs6759892	Ch2:234601669
UGT1A6	N	UGT1A6_c.315A>G(L105L)	AM_12973	rs1105880	Ch2:234601965
UGT1A6	T181A	UGT1A6_c.541A>G(T181A)	AM_12974	rs2070959	Ch2:234602191
UGT1A6	N	UGT1A6_c.627G>T(V209V)	AM_12976	rs17863783	Ch2:234602277
UGT1A6	N	UGT1A6_c.57A>T(A19A)	AM_12971	rs1042707	Ch2:234601707
UGT1A6	S70Y	UGT1A6_c.209C>A(S70Y)	AM_12972	rs1042708	Ch2:234601859
UGT1A7	*12	UGT1A7*12_c.-57T>G(5'UTR)	AM_12956	rs7586110	Ch2:234590527
UGT1A7	*5	UGT1A7*5_c.343G>A(G115S)	AM_12961	rs61261057	Ch2:234590926
UGT1A8	*3	UGT1A8*3_c.830G>A(C277Y)	AM_12932	rs17863762	Ch2:234527183
UGT1A8	L105M	UGT1A8_c.313T>A(L105M)	AM_12911	rs1126788	Ch2:234526666
UGT1A8	N	UGT1A8_c.315G>A(L105L)	AM_12912	rs1126790	Ch2:234526668
UGT1A8	F109L	UGT1A8_c.327T>A(F109L)	AM_12913	rs1126792	Ch2:234526680
UGT1A8	L110M	UGT1A8_c.328C>A(L110M)	AM_12914	rs1126793	Ch2:234526681
UGT1A8	N118D	UGT1A8_c.352A>G(N118D)	AM_12915	rs1126798	Ch2:234526705
UGT1A8	M212V	UGT1A8_c.634A>G(M212V)	AM_12924	rs1126803	Ch2:234526987
UGT1A8	E216D	UGT1A8_c.648A>C(E216D)	AM_12925	rs1126804	Ch2:234527001
UGT1A9	*1b	UGT1A9*1b_c.-118insT	AM_12947	rs3832043	Ch2:234580463
UGT1A9	*3	UGT1A9*3_c.98T>C(M33T)	AM_12949	rs72551330	Ch2:234580678
UGT1A9	*4	UGT1A9*4_c.726T>G(Y242X)	AM_12951	rs66915469	Ch2:234581306
UGT1A9	*5	UGT1A9*5_c.766G>A(D256N)	AM_12953	rs58597806	Ch2:234581346
UGT1A9	C3W	UGT1A9_c.9C>G(C3W)	AM_12948	rs72551329	Ch2:234580589
UGT1A10	*5	UGT1A10*5_c.177G>A(M59I)	AM_12938	rs56935833	Ch2:234545345
UGT1A10	N	UGT1A10_c.597T>C(D199D)	AM_12941	rs45523834	Ch2:234545765
UGT1A10	*6	UGT1A10*6_c.605C>T(T202I)	AM_12942	rs58704432	Ch2:234545773
UGT2B7	N	UGT2B7*2_c.-327G>A(Promoter)	AM_13458	rs7662029	Ch4:69961912
UGT2B7	N	UGT2B7*2_c.-161C>T(Promoter)	AM_13459	rs7668258	Ch4:69962078
UGT2B7	*3	UGT2B7*3_c.211G>T(A71S)	AM_13460	rs12233719	Ch4:69962449
UGT2B7	N	UGT2B7_c.735A>G(T245T)	AM_13463	rs28365062	Ch4:69964271
UGT2B7	N	UGT2B7*2_c.801T>A(P267P)	AM_13464	rs7438284	Ch4:69964337
UGT2B7	*2	UGT2B7*2_c.802C>T(H268Y)	AM_13465	rs7439366	Ch4:69964338
UGT2B7	N	UGT2B7_c.1062C>T(Y354Y)	AM_13468	rs4348159	Ch4:69972952
UGT2B15	D85Y	UGT2B15_c.253G>T(D85Y)	AM_13439	rs1902023	Ch4:69536084
UGT2B15	K523T	UGT2B15_c.1568A>C(K523T)	AM_13437	rs4148269	Ch4:69512847
UGT2B15	K523T	UGT2B15_c.1568A>C(K523T)	AM_13444	rs4148269	Ch4:69512847
UGT2B15	A500T	UGT2B15_c.1498G>A(A500T)	AM_13445	rs72551390	Ch4:69512917
UGT2B15	N	UGT2B15_c.*131C>G(3'UTR)	AM_13443	rs72551389	Ch4:69512692
UGT2B15	N	UGT2B15_c.*168C>T(3'UTR)	AM_13442	rs3100	Ch4:69512655
UGT2B15	N	UGT2B15_c.*185A>T(3'UTR)	AM_13441	rs4148271	Ch4:69512637
UGT2B17	N	UGT2B17_c.1006-2603T>C	AM_13428	rs4860305	Ch4:69420232
UGT2B17	N	UGT2B17_c.1313+840A>G	AM_13425	rs7436962	Ch4:69415555
UGT2B17	H450Y	UGT2B17_c.1348C>T(H450Y)	AM_13423	rs72551385	Ch4:69403588
VKORC1	N	VKORC1_c.-1639G>A(Promoter)	AM_11054	rs9923231	Ch16:31107689
VKORC1	N	VKORC1_c.173+324T>G	AM_11049	rs2884737	Ch16:31105554
VKORC1	N	VKORC1_c.173+525C>T	AM_11047	rs17708472	Ch16:31105353
VKORC1	N	VKORC1_c.174-136C>T	AM_11045	rs9934438	Ch16:31104878
VKORC1	N	VKORC1_c.283+124G>C	AM_11043	rs8050894	Ch16:31104509
VKORC1	N	VKORC1_c.283+837C>T	AM_11040	rs2359612	Ch16:31103796
VKORC1	N	VKORC1_c.*134G>A(3'UTR)	AM_11034	rs7294	Ch16:31102321
VKORC1	N	VKORC1_c.-5014T>C(Promoter)	AM_11061	rs17884388	Ch16:31111064
VKORC1	N	VKORC1_c.-1877A>G(Promoter)	AM_11055	rs17878544	Ch16:31107927
VKORC1	V29L	VKORC1_c.85G>T(V29L)	AM_11052	rs104894539	Ch16:31105966
VKORC1	V45A	VKORC1_c.134T>C(V45A)	AM_11051	rs104894540	Ch16:31105917
VKORC1	R58G	VKORC1_c.172A>G(R58G)	AM_11050	rs104894541	Ch16:31105879
VKORC1	N	VKORC1_c.173+486C>A	AM_11048	rs13337470	Ch16:31105392
VKORC1	N	VKORC1_c.174-429C>T	AM_11046	rs13336384	Ch16:31105171
VKORC1	V66M	VKORC1_c.196G>A(V66M)	AM_11044	rs72547529	Ch16:31104720
VKORC1	N	VKORC1_c.283+186T>C	AM_11042	rs17886199	Ch16:31104447
VKORC1	N	VKORC1_c.283+231G>A	AM_11041	rs17884850	Ch16:31104402
VKORC1	N	VKORC1_c.284-882A>T	AM_11039	rs17884982	Ch16:31103545
VKORC1	R98W	VKORC1_c.292C>T(R98W)	AM_11038	rs72547528	Ch16:31102655
VKORC1	N	VKORC1_c.358C>T(L120L)	AM_11037	rs7200749	Ch16:31102589
VKORC1	L128R	VKORC1_c.383T>G(L128R)	AM_11036	rs104894542	Ch16:31102564
VKORC1	N	VKORC1_c.*131C>A(3'UTR)	AM_11035	rs11540137	Ch16:31102324
